# Supplementary material for: Local and global chemical shaping of bacterial communities by redox potential
Source: bioRxiv or medRxiv preprint supplement (doi:10.1101/2021.10.12.464155), 2021-10-13

Pearl River Estuary (MLL+18)  
River & Seawater – Bacteria

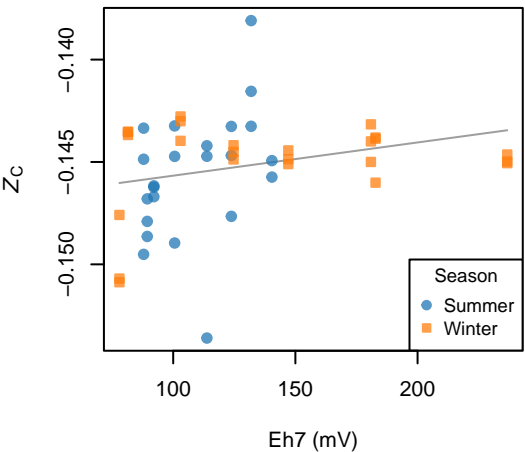

Black Sea (SVH+19)  
River & Seawater – Bacteria

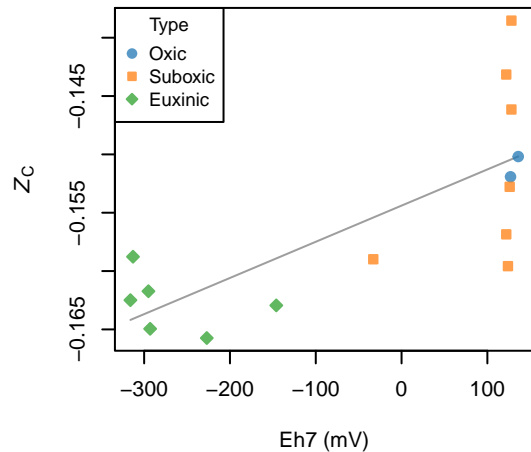

Black Sea (SVH+19)  
River & Seawater – Archaea

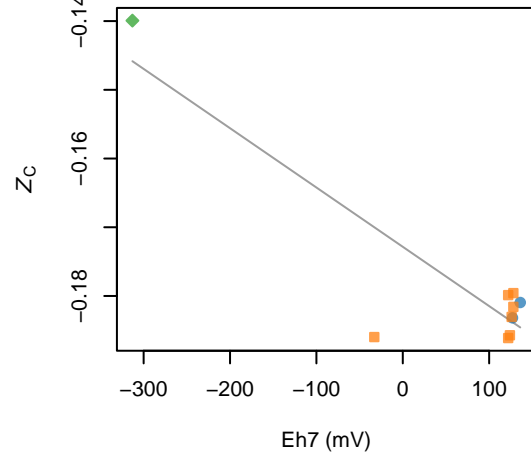

Sansha Yongle Blue Hole (HXZ+20)  
River & Seawater – Bacteria

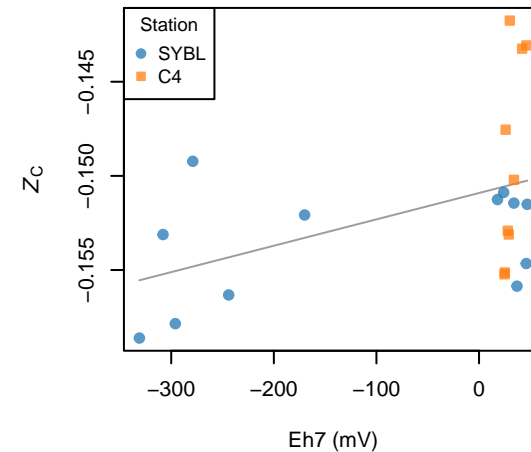

Han River Cyanobacterial Blooms (KLY+20)  
River & Seawater – Bacteria

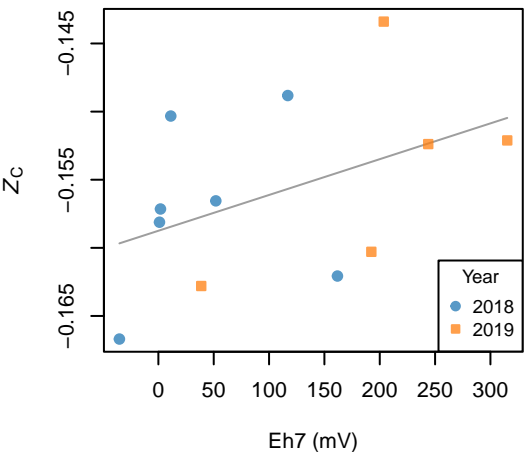

Bahe River (WHL+21)  
River & Seawater – Bacteria

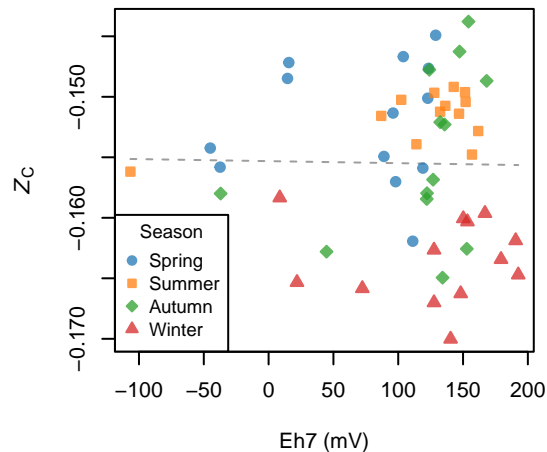

Lancang River (LXH+20)  
River & Seawater – Bacteria

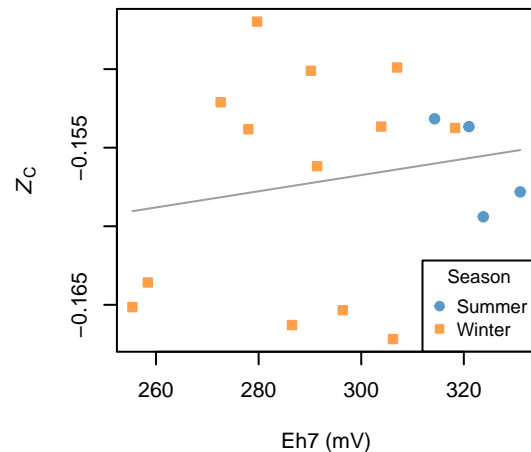

Lagoon of Venice (JVW+20)  
River & Seawater – Bacteria

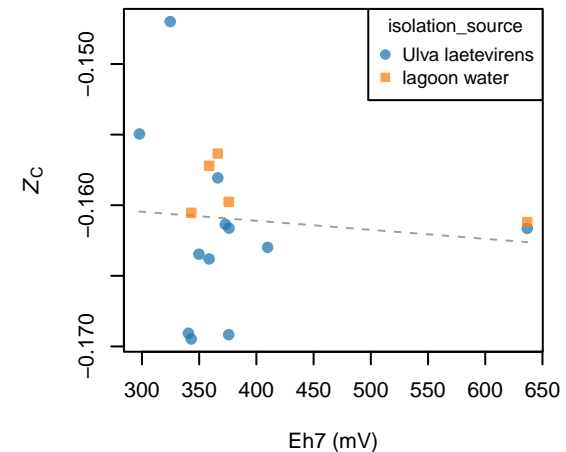

Maozhou River (ZZL+21)  
River & Seawater – Bacteria

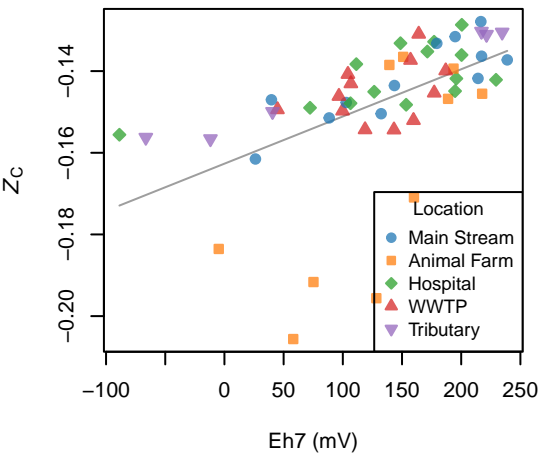

Three Gorges Reservoir (GZL21)  
River & Seawater – Bacteria

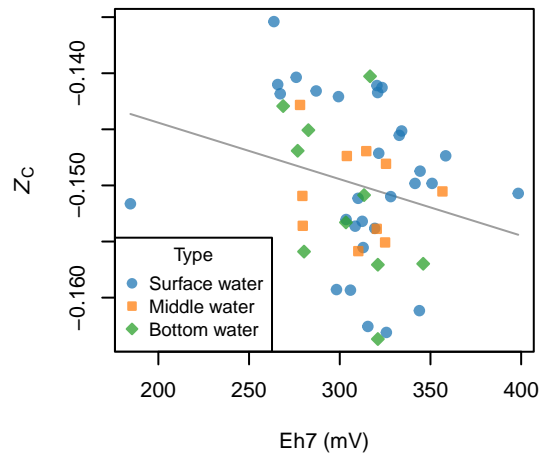

Kiritimati Microbial Mat (SAR+13)  
Lake & Pond – Bacteria

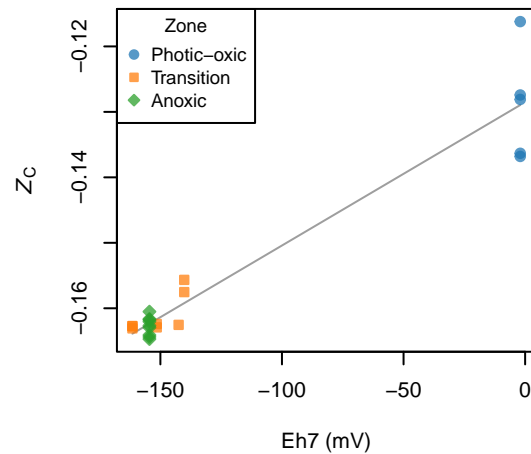

Kiritimati Microbial Mat (SAR+13)  
Lake & Pond – Archaea

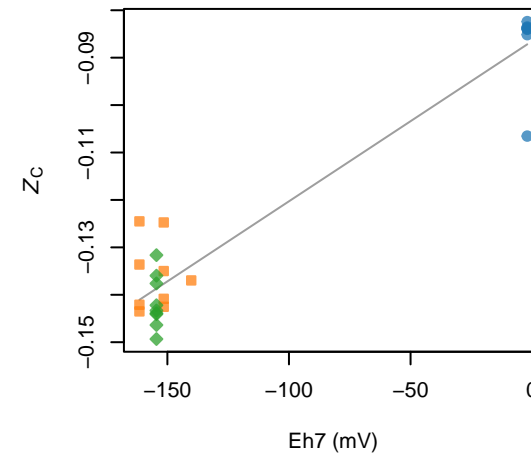

Siguniang Mountain (LZR+17)

Lake & Pond – Bacteria

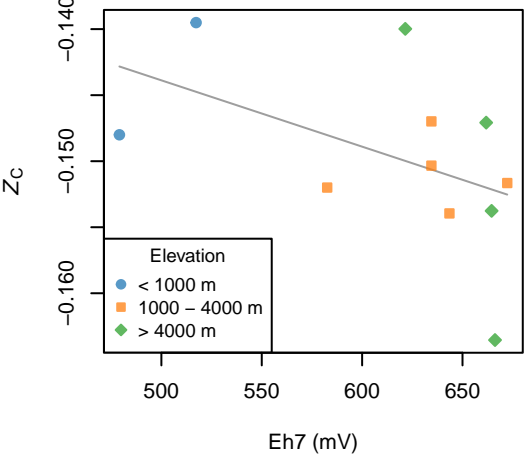

Andean Lakes (ECS+18)

Lake & Pond – Bacteria

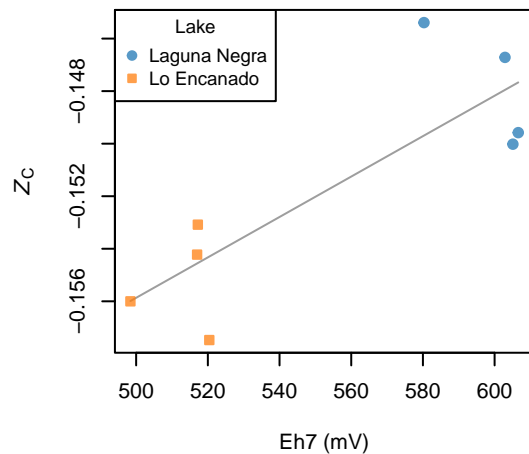

Xidong Reservoir, Xiamen (LLC+19)

Lake & Pond – Bacteria

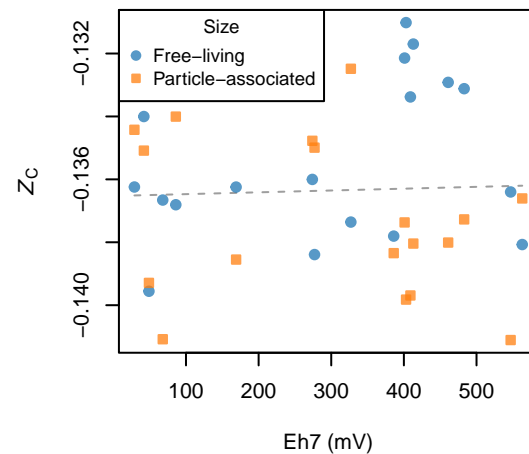

Potentilla Lake (SCH+16)

Lake & Pond – Bacteria

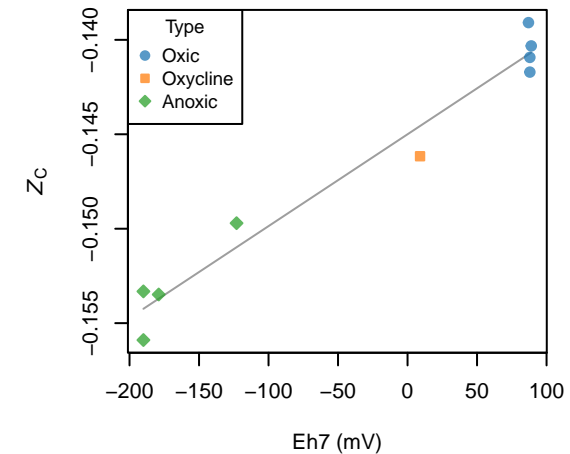

Potentilla Lake (SCH+16)

Lake & Pond – Archaea

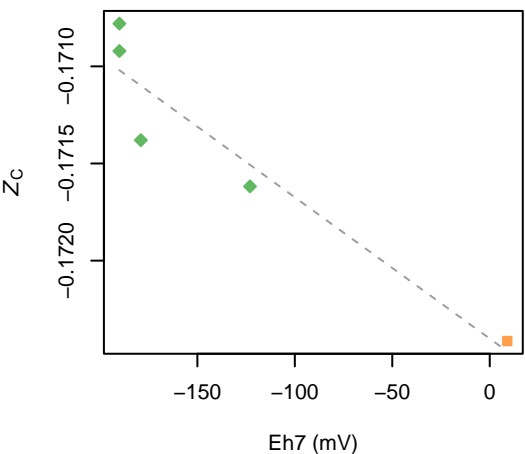

Ursu Lake (BCA+21)

Lake & Pond – Bacteria

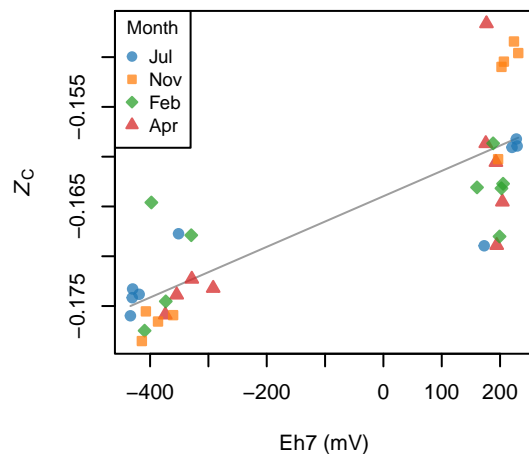

Xiamen Reservoirs and Ponds (HLZ+18)

Lake & Pond – Bacteria

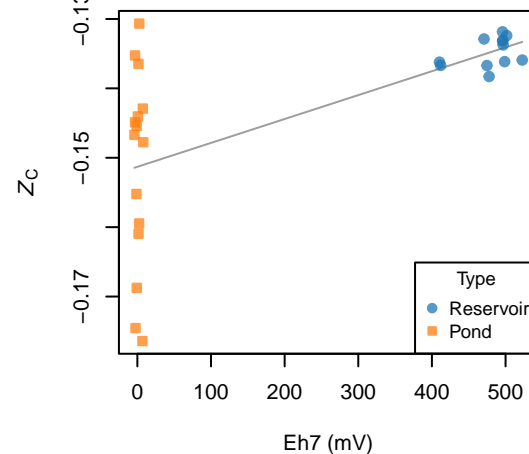

Mid-Atlantic Agricultural Pond (CNA+20)

Lake & Pond – Bacteria

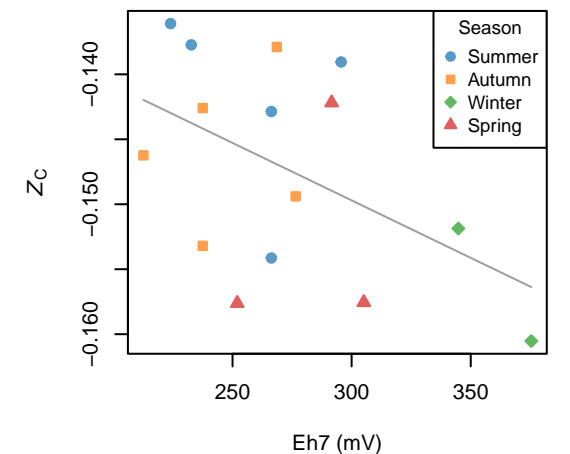

Keweenaw Waterway (BWD+19)

Lake & Pond – Bacteria

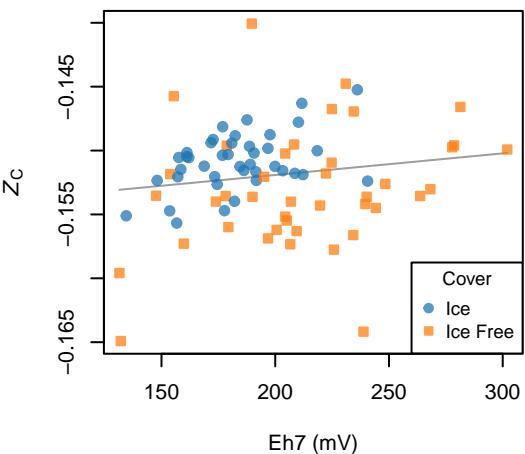

Finnish Lakes (RSJ+21)

Lake & Pond – Bacteria

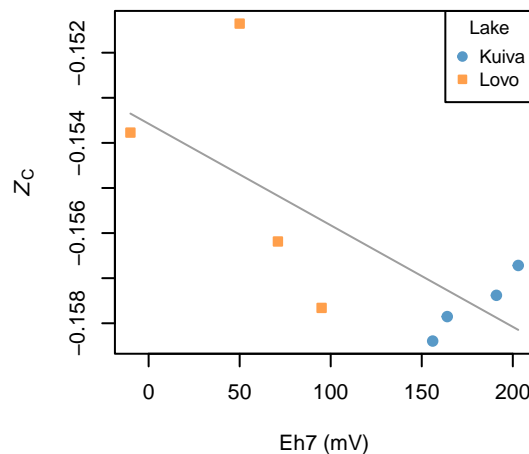

Finnish Lakes (RSJ+21)

Lake & Pond – Archaea

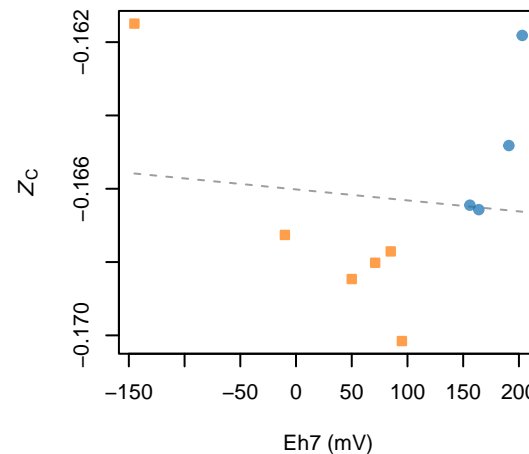

Fayetteville Green Lake (BOEM21)

Lake & Pond – Bacteria

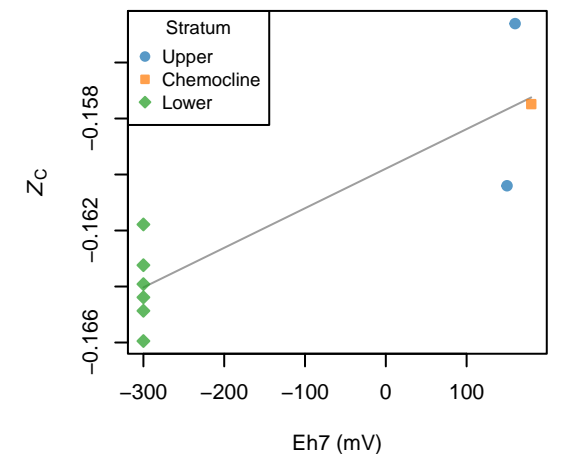

Iberian Pyrite Belt (GSY+20)

Lake & Pond – Bacteria

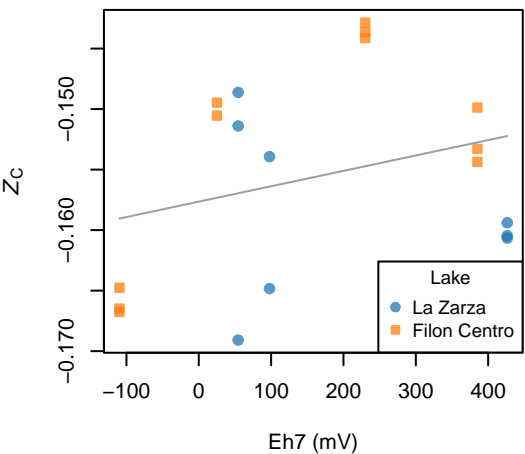

Iberian Pyrite Belt (GSY+20)

Lake & Pond – Archaea

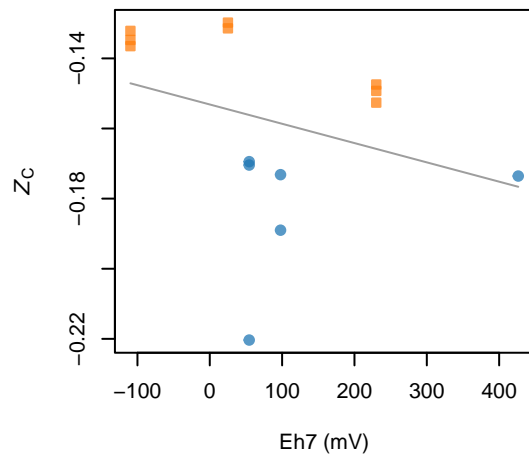

Lake Kinneret (NLE+21)

Lake & Pond – Bacteria

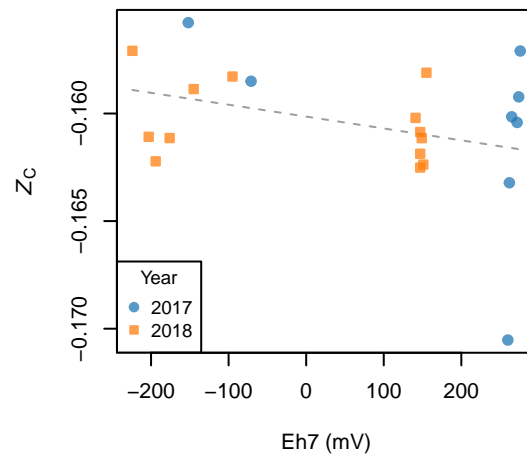

Lake Sonachi (FAV+21)

Lake & Pond – Bacteria

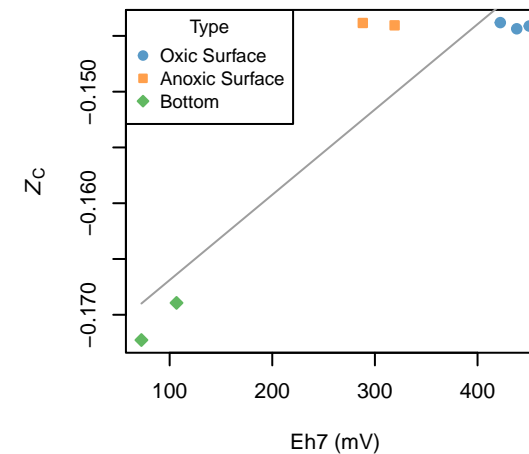

Lake Sonachi (FAV+21)

Lake & Pond – Archaea

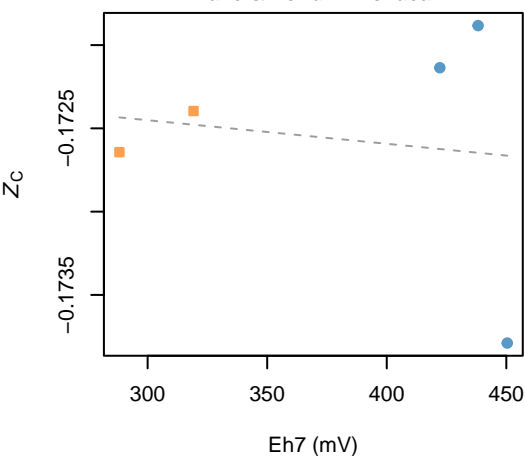

Peña de Hierro (GRG+20)

Lake & Pond – Bacteria

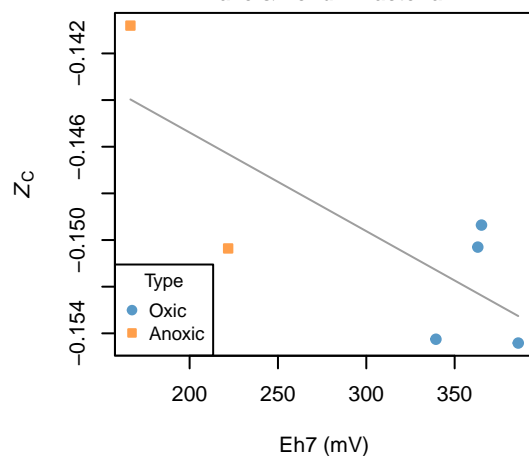

Peña de Hierro (GRG+20)

Lake & Pond – Archaea

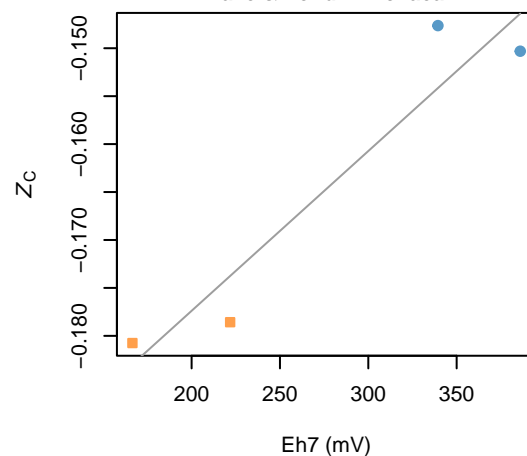

Bison Pool, Yellowstone NP (SMS+12)

Hot Spring – Bacteria

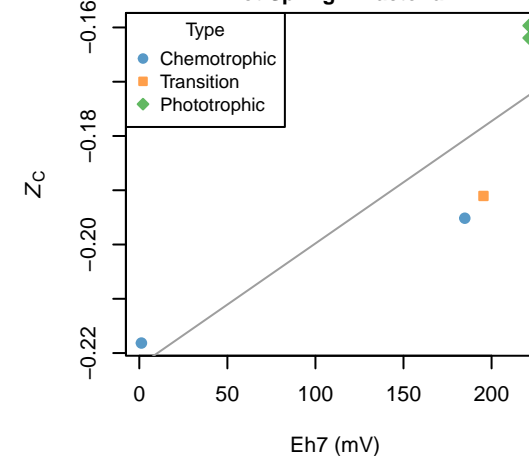

Bison Pool, Yellowstone NP (SMS+12)

Hot Spring – Archaea

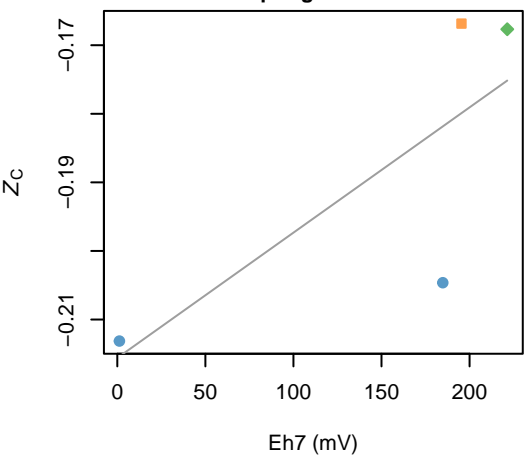

New Zealand Hot Springs (PCL+18)

Hot Spring – Acidic – Bacteria

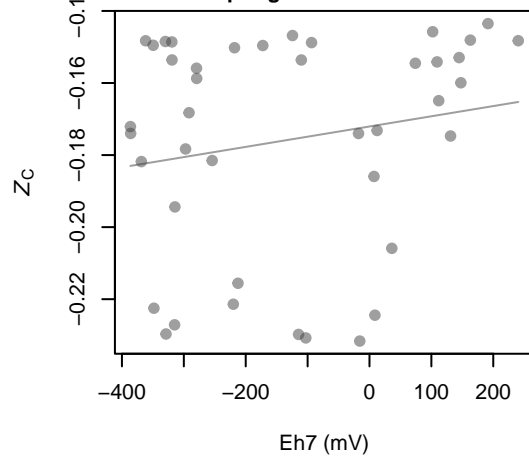

New Zealand Hot Springs (PCL+18)

Hot Spring – Acidic – Archaea

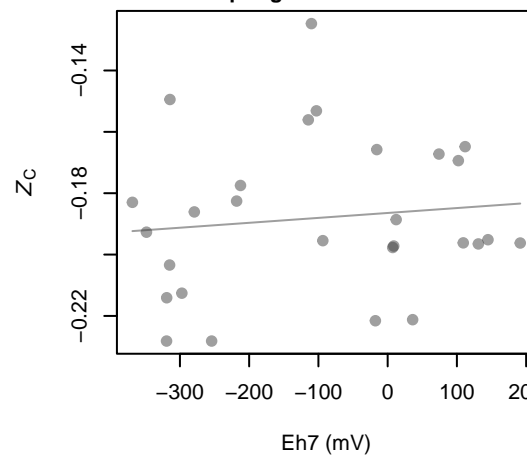

New Zealand Hot Springs (PCL+18)

Hot Spring – Alkaline – Bacteria

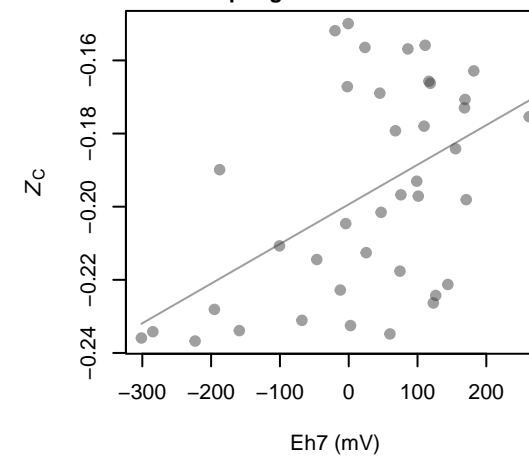

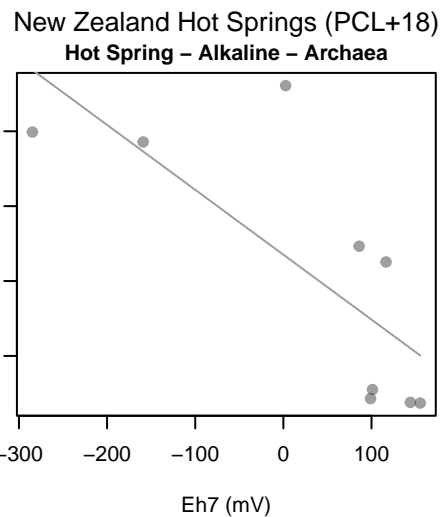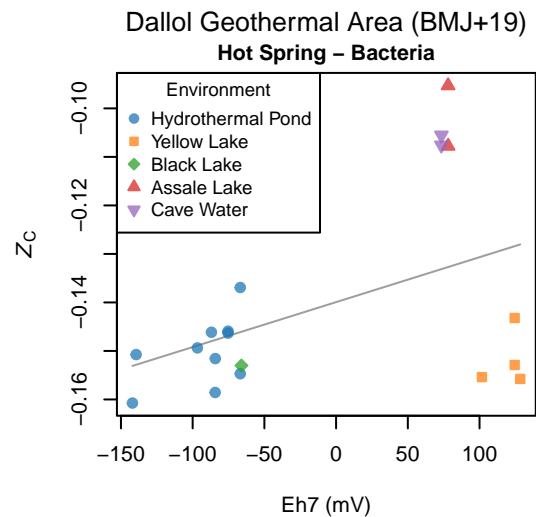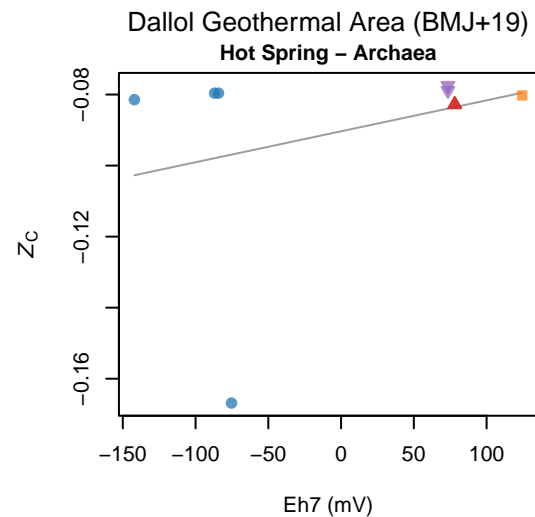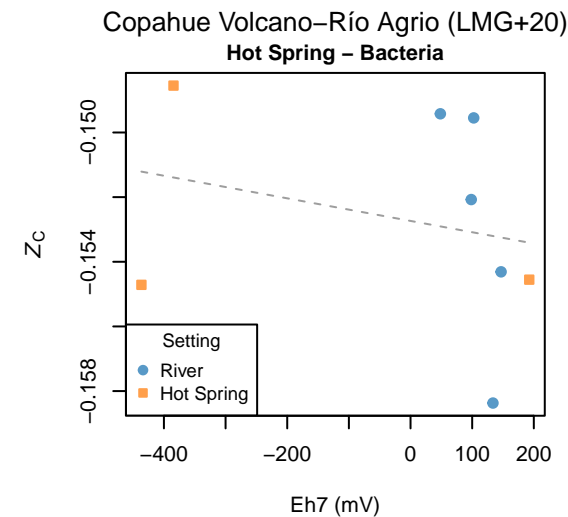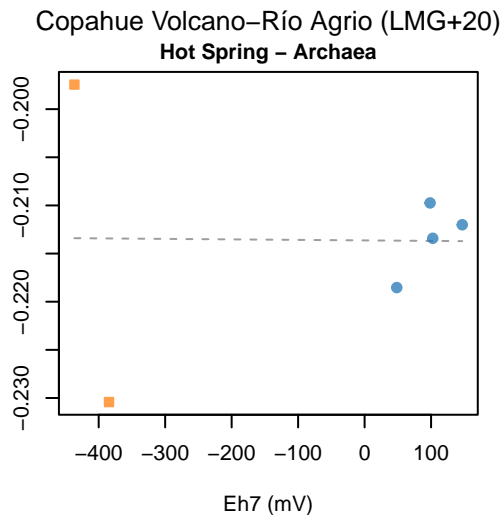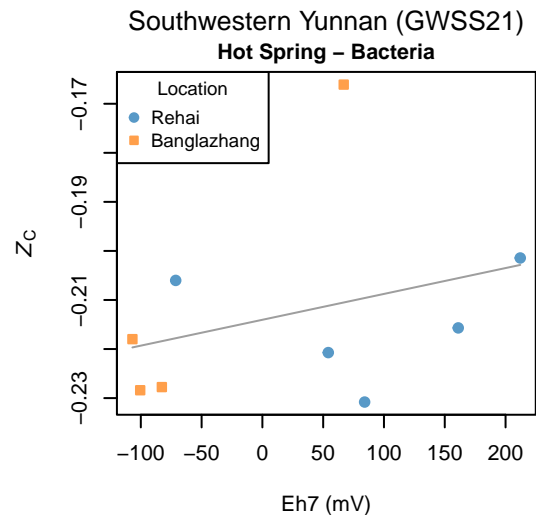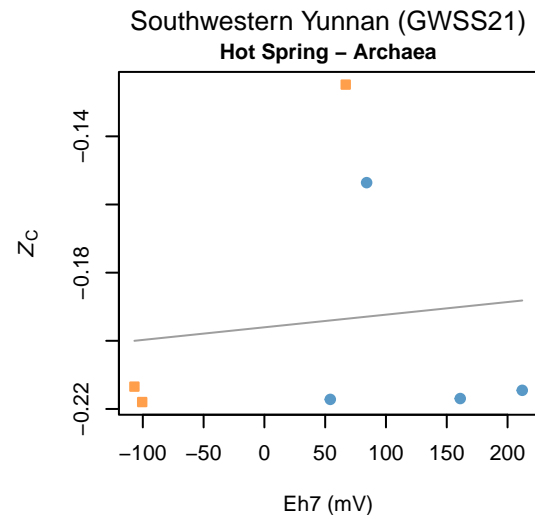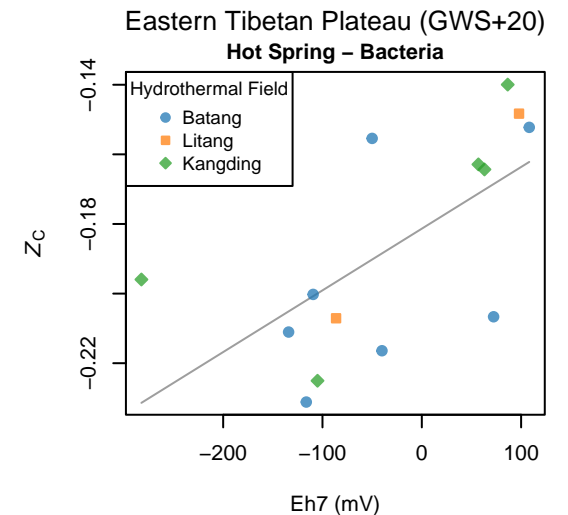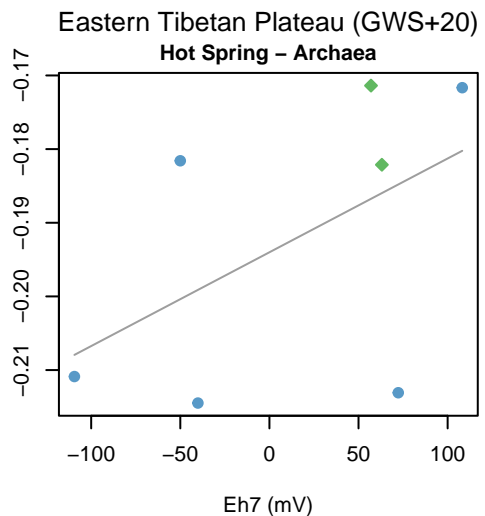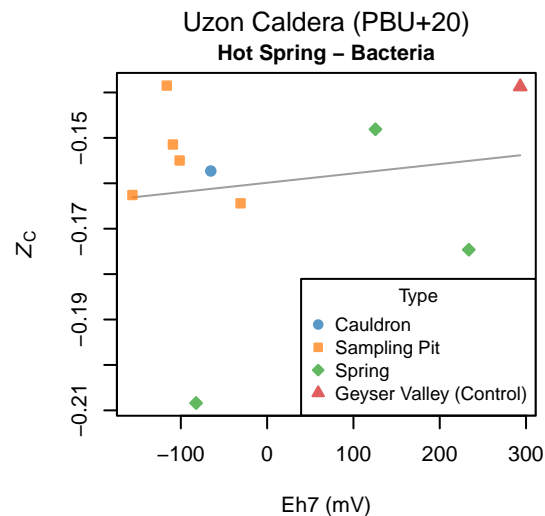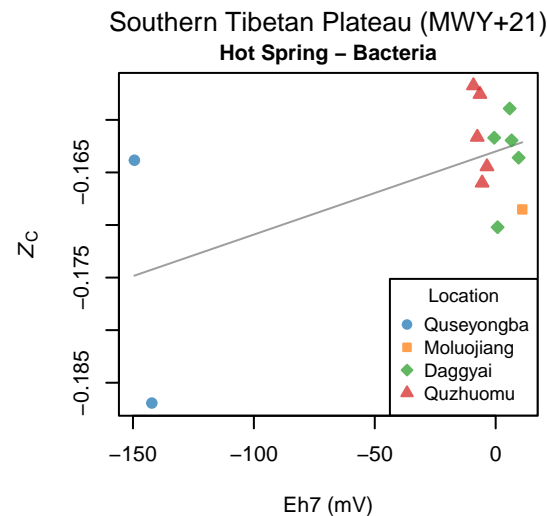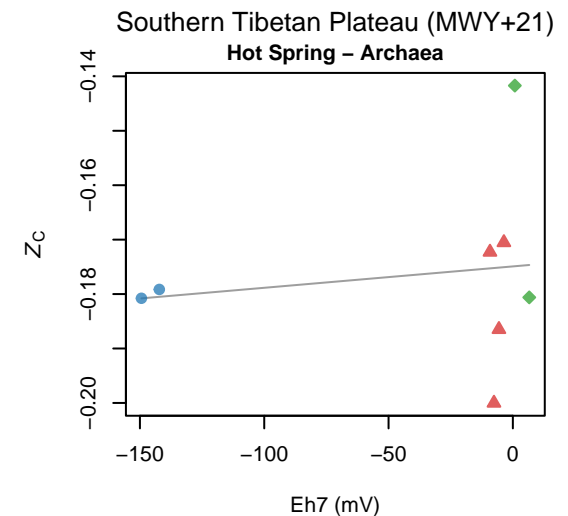

Japan Hydrothermal Sediment (OFY+19)  
Hot Spring – Bacteria

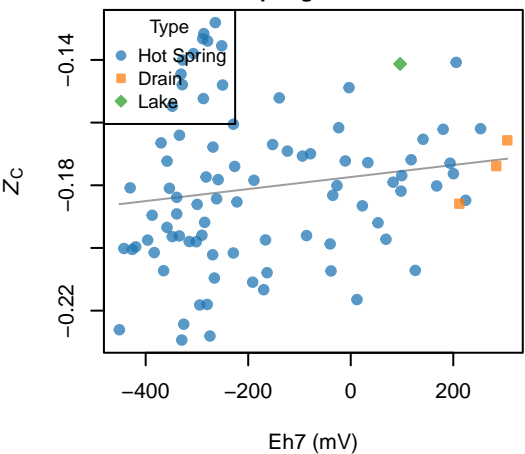

Japan Hydrothermal Sediment (OFY+19)  
Hot Spring – Archaea

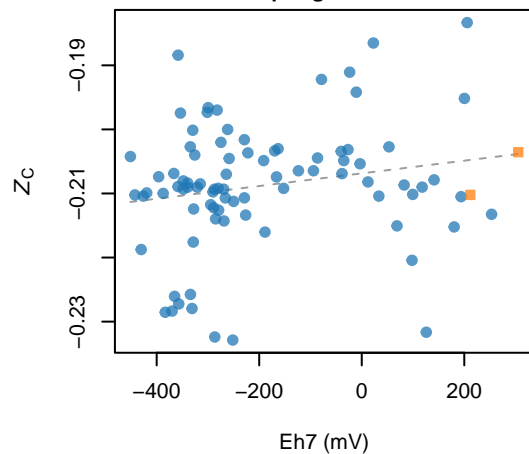

CROMO (SBP+20)  
Alkaline Spring – Bacteria

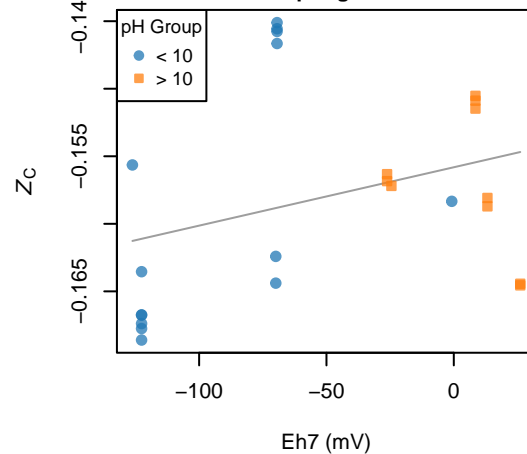

Samail Ophiolite (RMB+17)  
Alkaline Spring – Bacteria

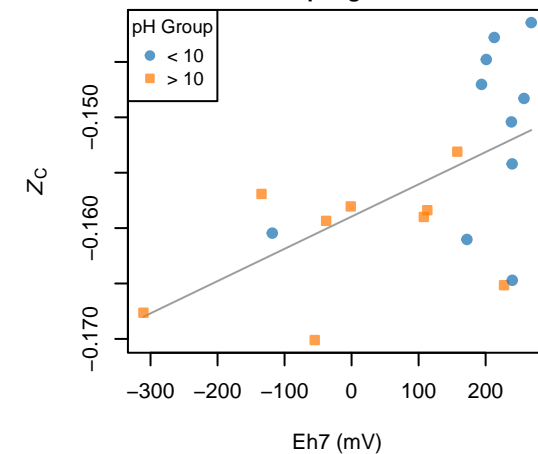

Samail Ophiolite (RMB+17)  
Alkaline Spring – Archaea

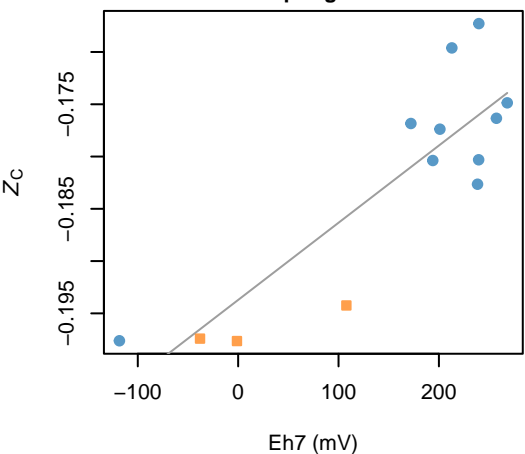

Santa Elena Ophiolite (CTS+17)  
Alkaline Spring – Bacteria

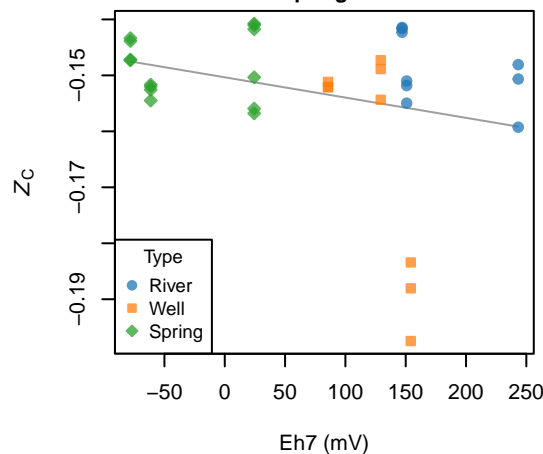

Santa Elena Ophiolite (CTS+17)  
Alkaline Spring – Archaea

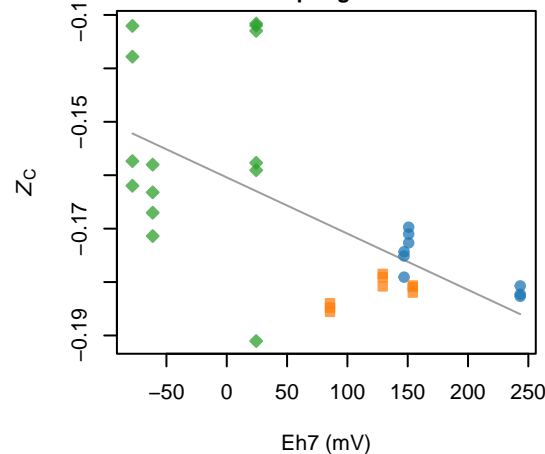

Voltri Massif (KSR+21)  
Alkaline Spring – Bacteria

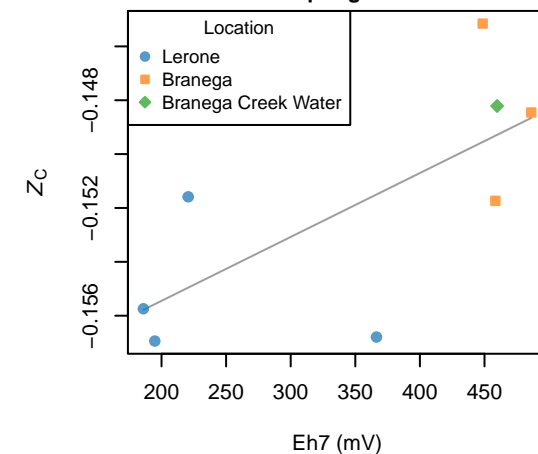

Samail Ophiolite Packers (NTB+21)  
Alkaline Spring – Bacteria

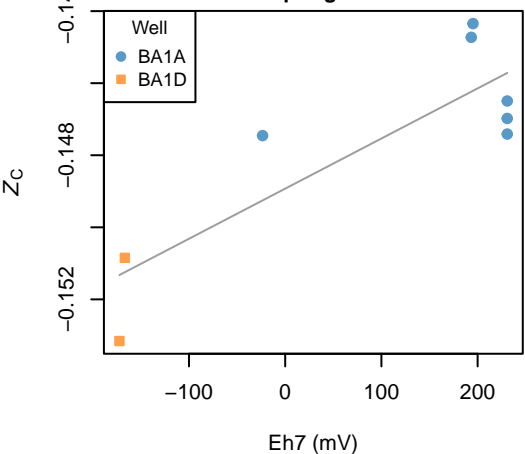

Samail Ophiolite Packers (NTB+21)  
Alkaline Spring – Archaea

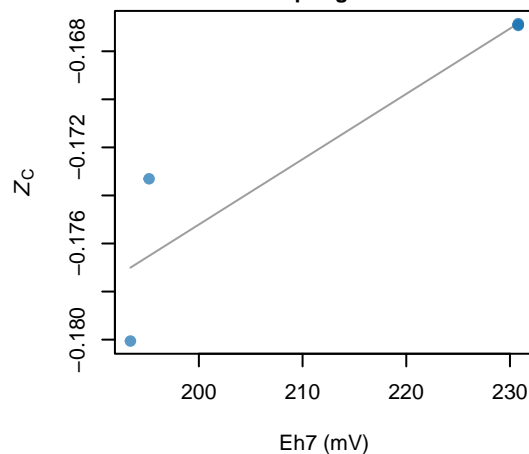

Sarnia nZVI Injection (KLM+16)  
Groundwater – Bacteria

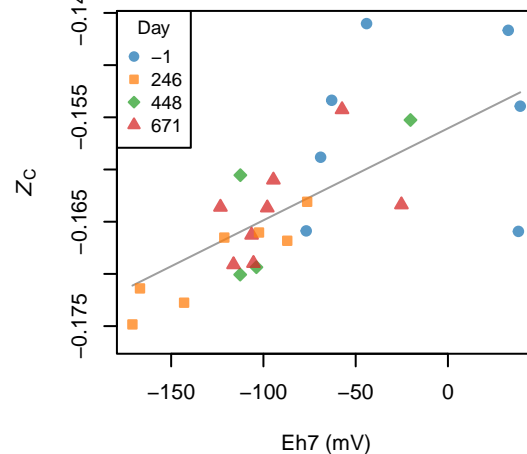

Mahomet Aquifer (YHK+19)  
Groundwater – Bacteria

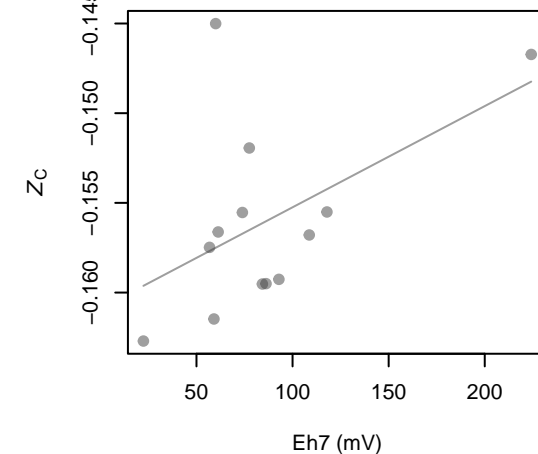

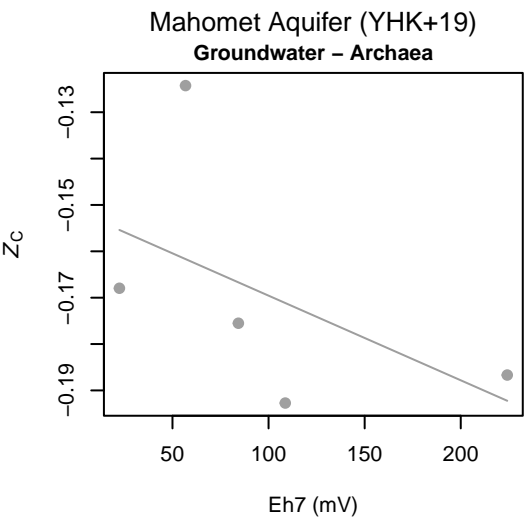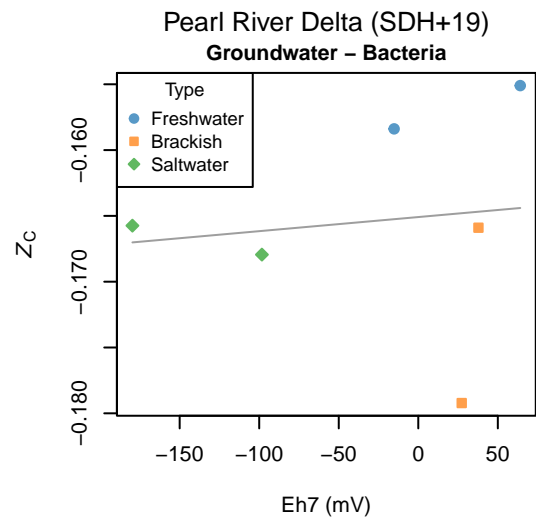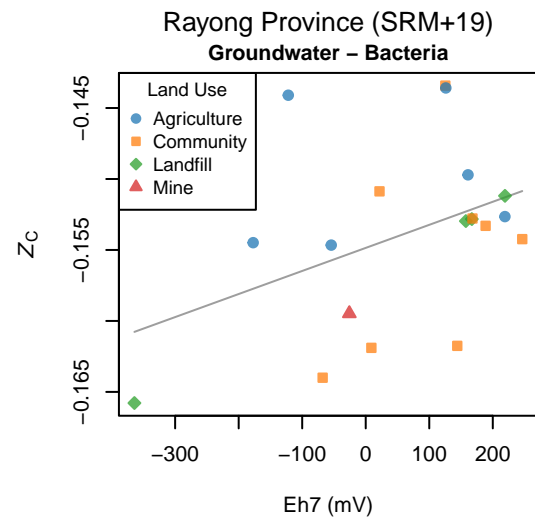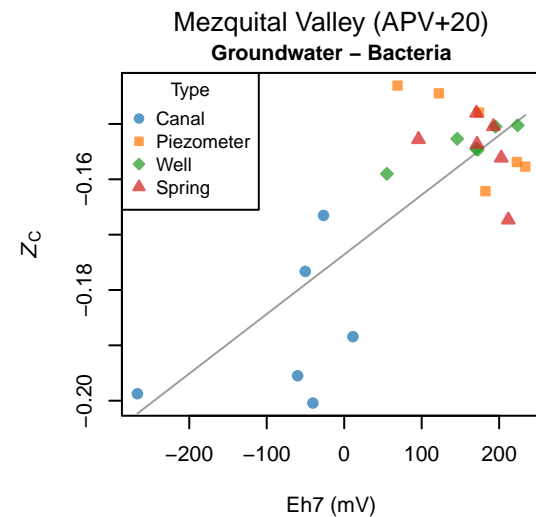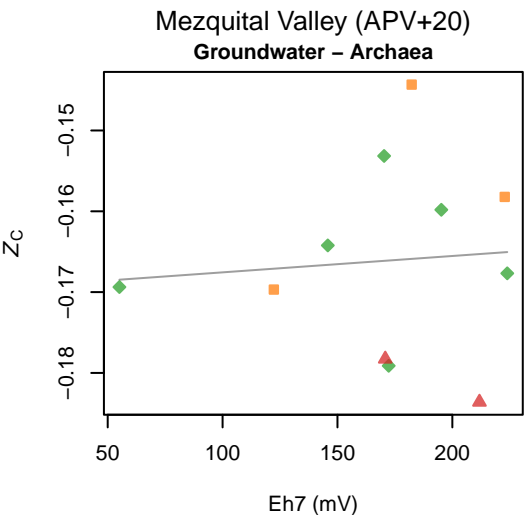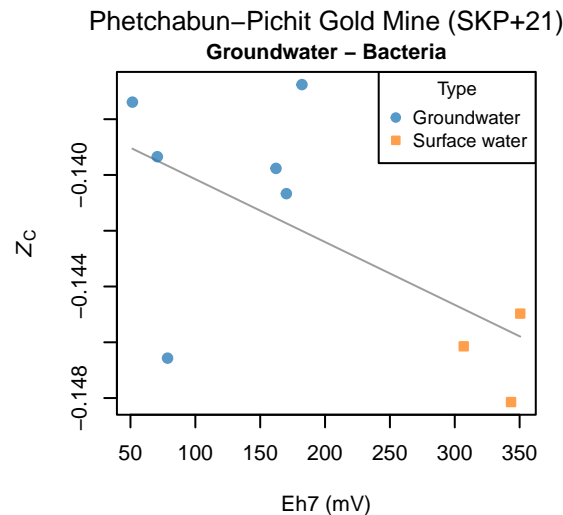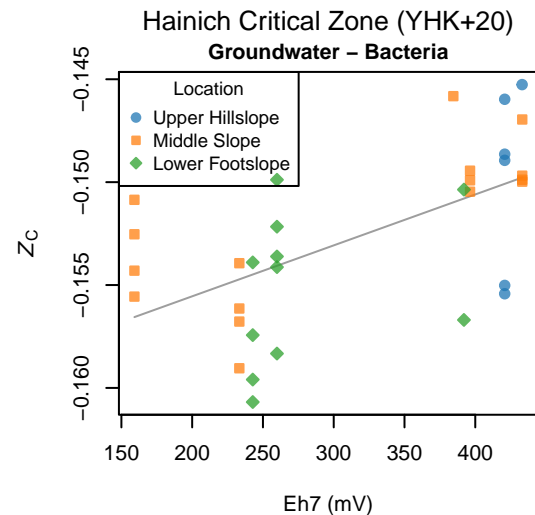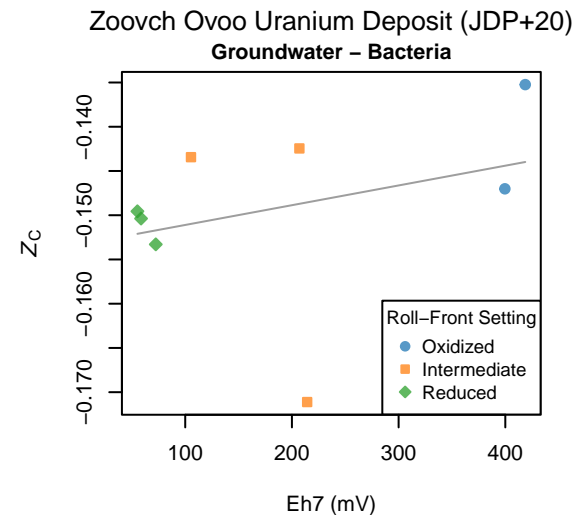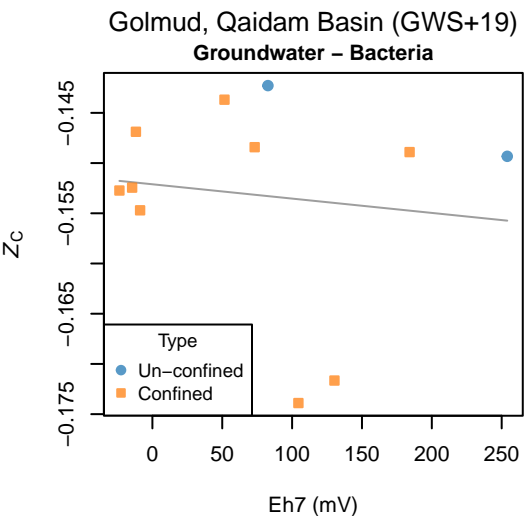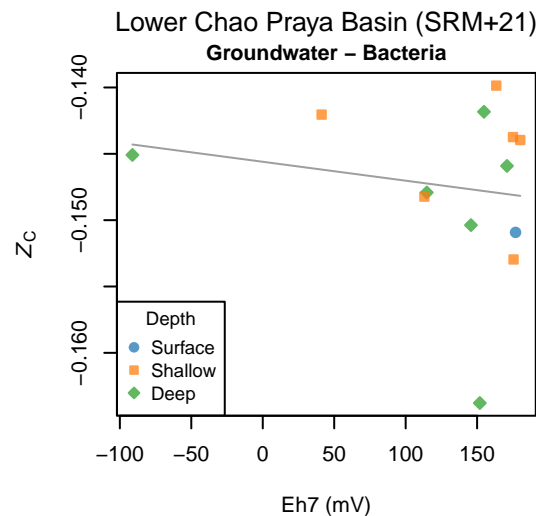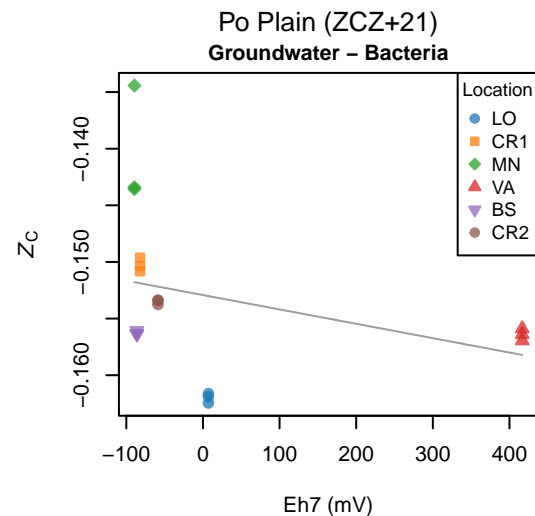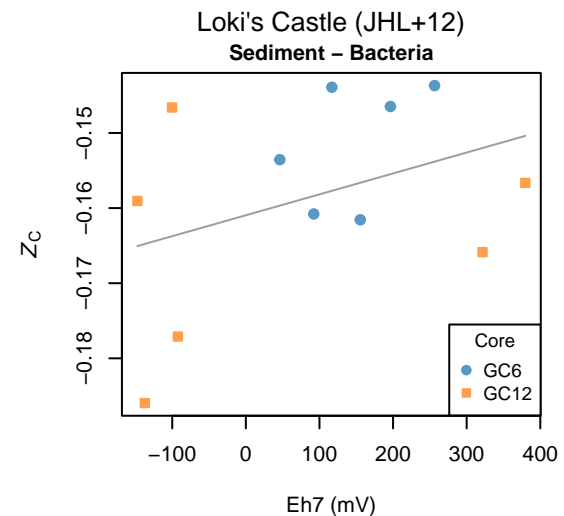

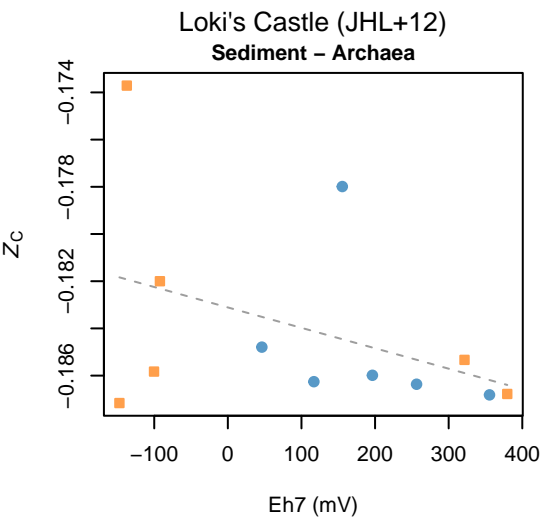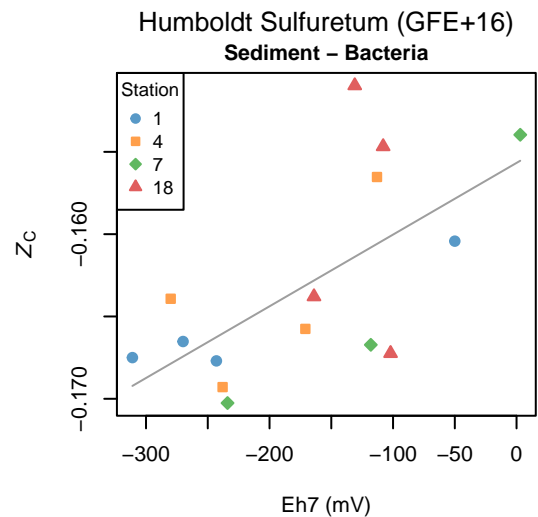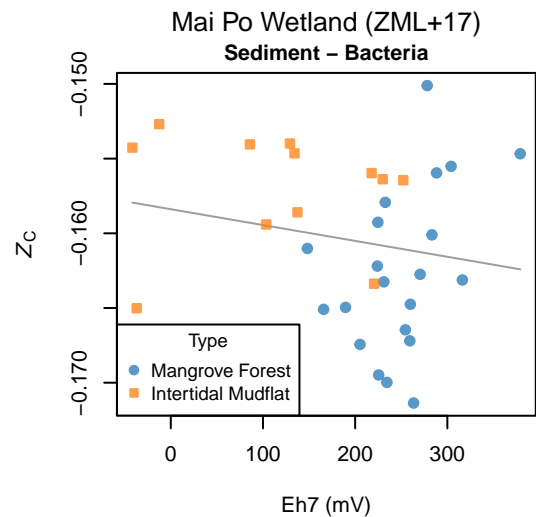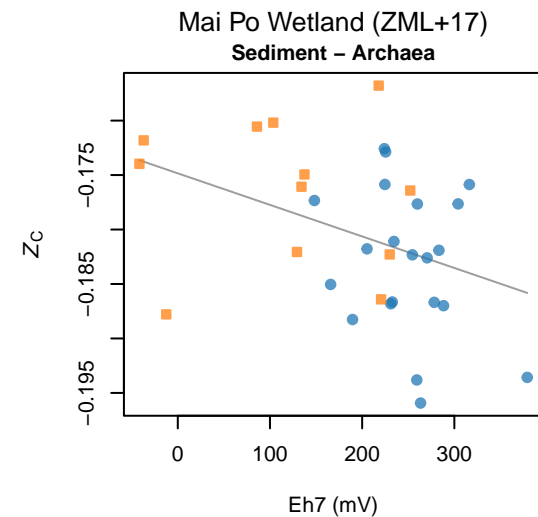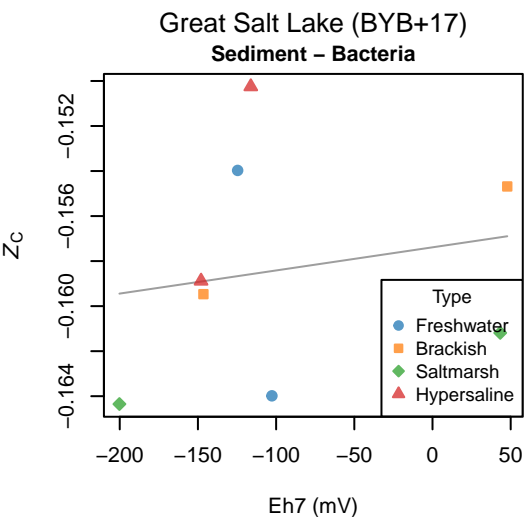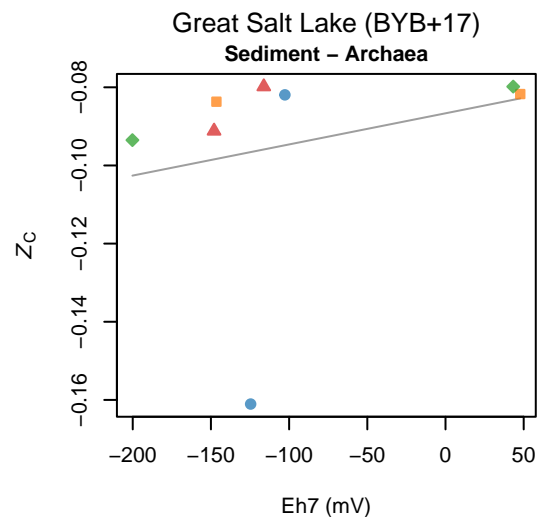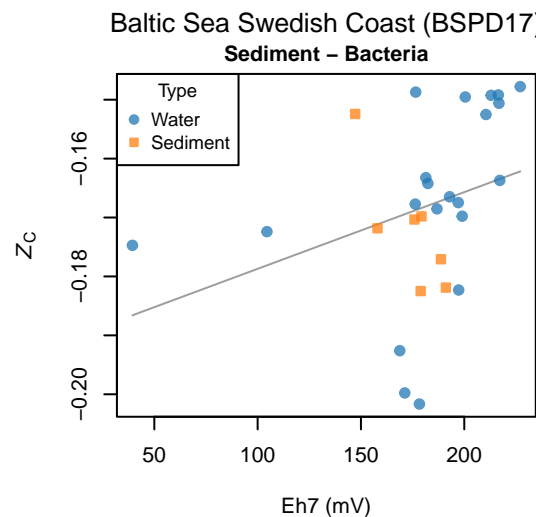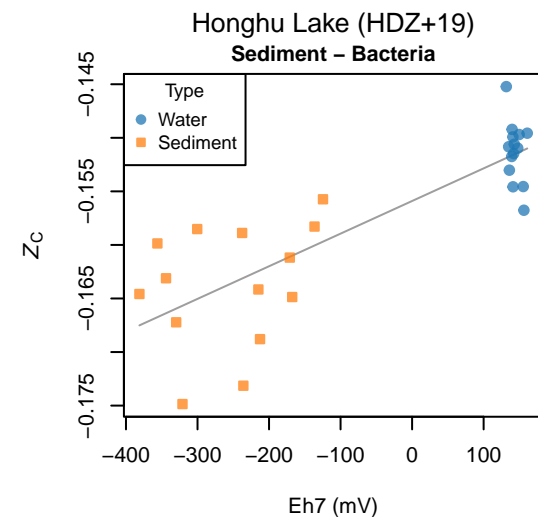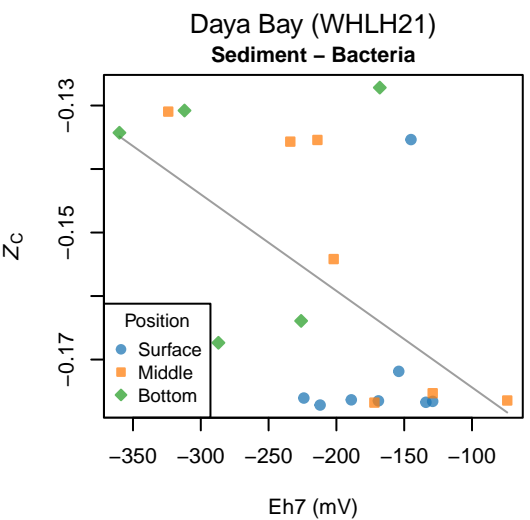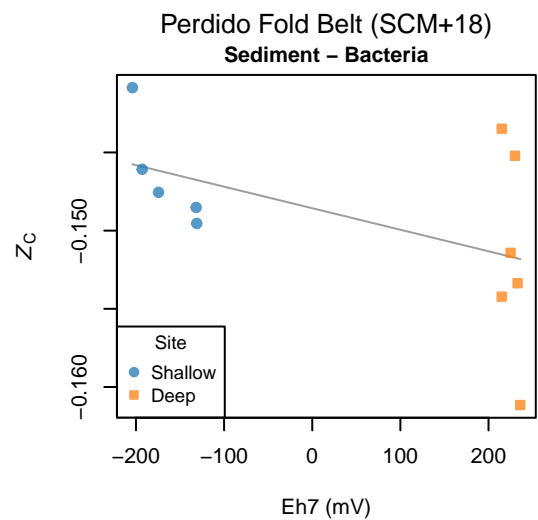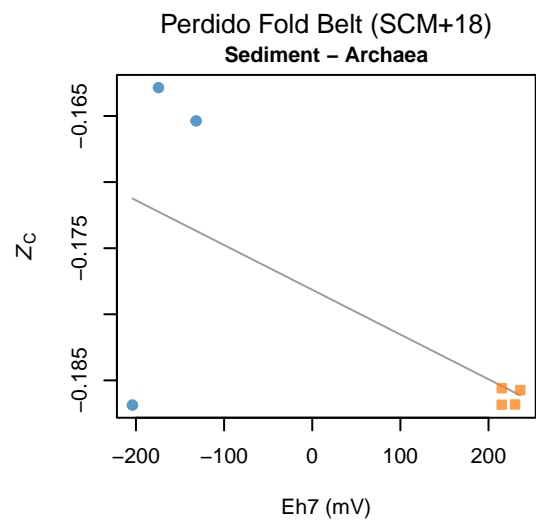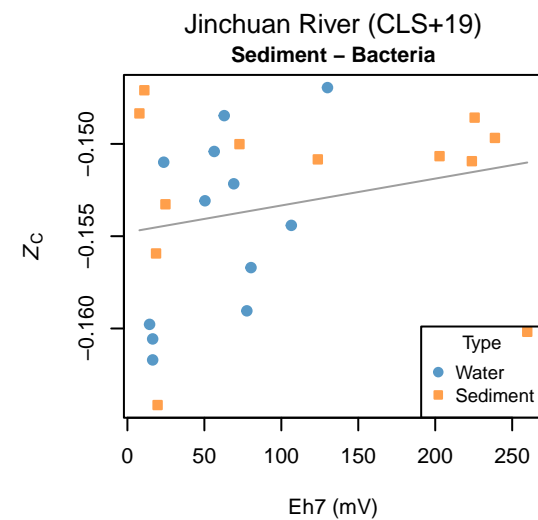

Jinchuan River (CLS+19)

Sediment – Archaea

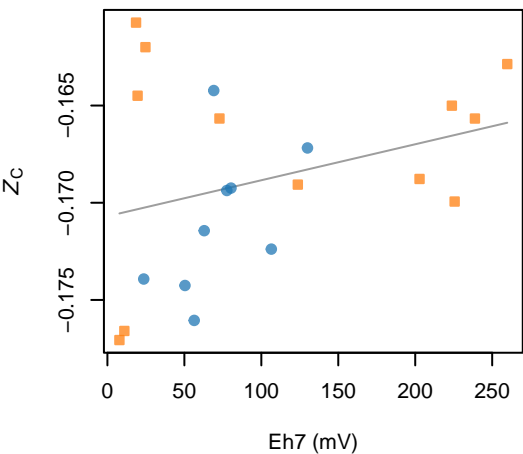

Loa River (ZDA+20)

Sediment – Bacteria

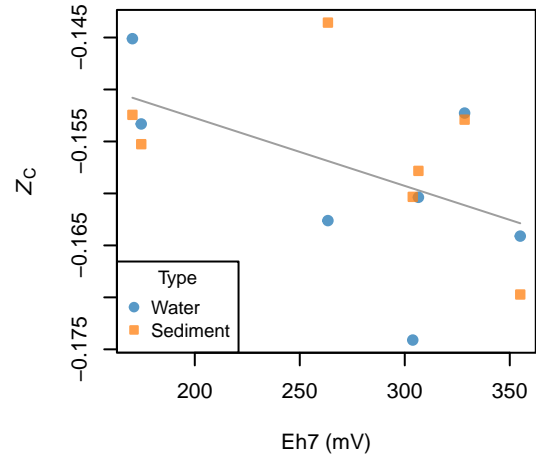

Cock Soda Lake (VMB+19)

Sediment – Bacteria

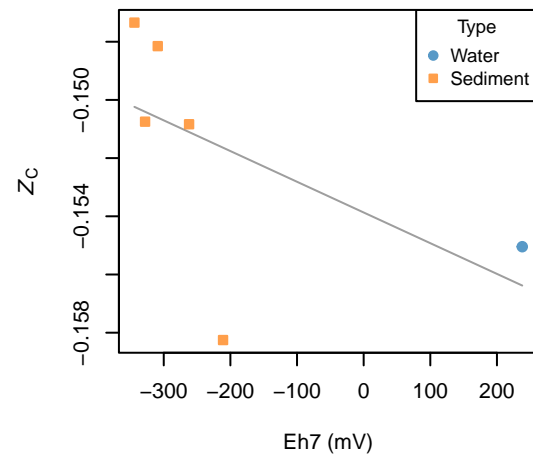

Cock Soda Lake (VMB+19)

Sediment – Archaea

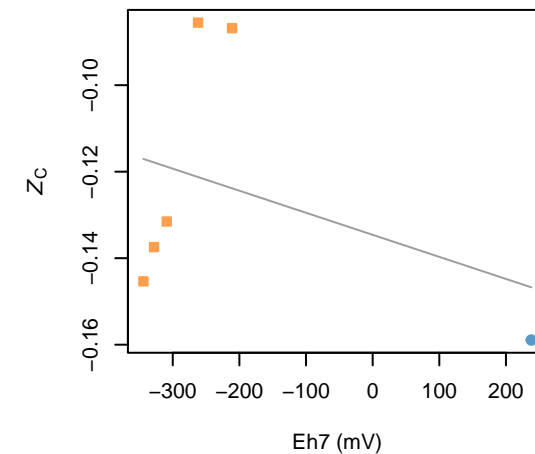

Qiangtang River Estuary (WHC+19)

Sediment – Archaea

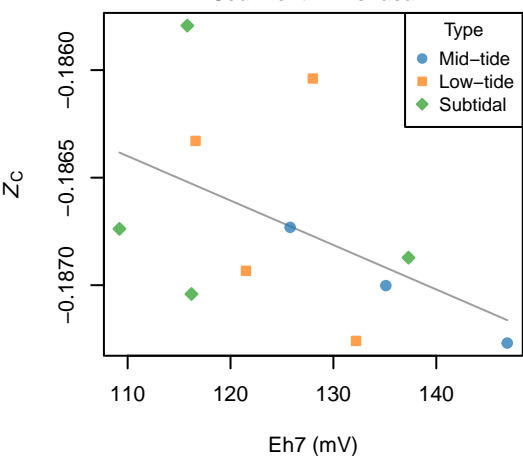

Lake Neusiedl (HSF+19)

Sediment – Bacteria

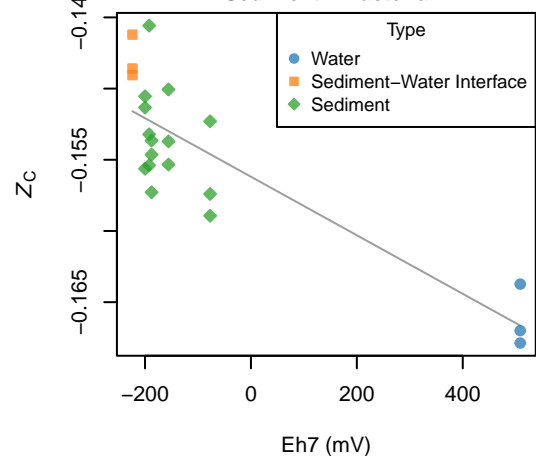

Valparaíso Bay (MCS+21)

Sediment – Bacteria

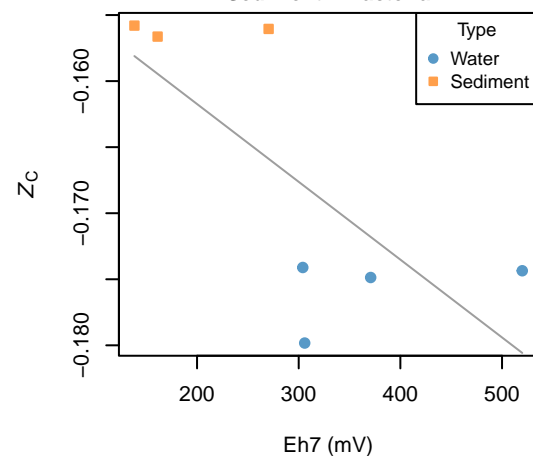

Valparaíso Bay (MCS+21)

Sediment – Archaea

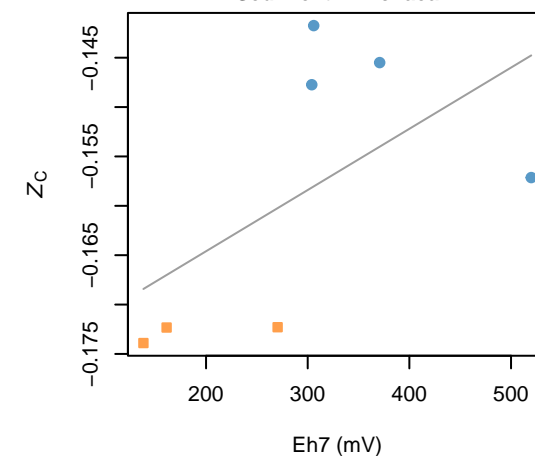

Bay of Biscay (LMBA21)

Sediment – 2017 – Bacteria

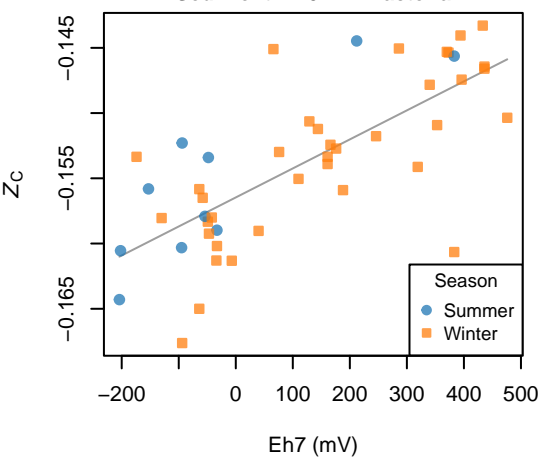

Bay of Biscay (LMBA21)

Sediment – 2017 – Archaea

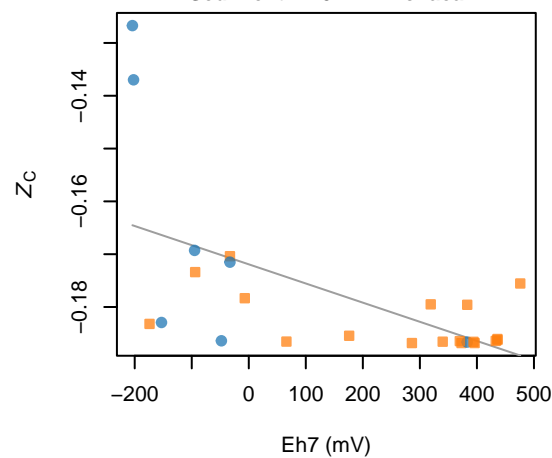

Maozhou River Hyporheic Zone (ZZLL21)

Sediment – Bacteria

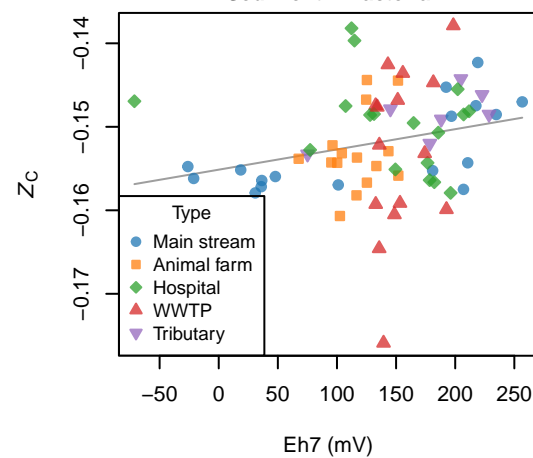

Estuarine Sediment Mesocosms (WFB+21)

Sediment – Bacteria

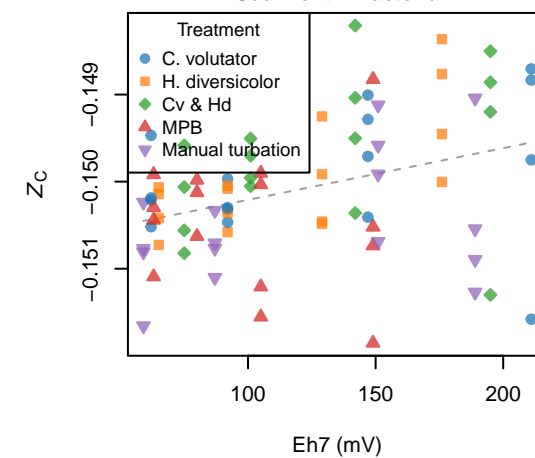



Biochar in Paddy Soil (SBW+17)

Soil – Bacteria

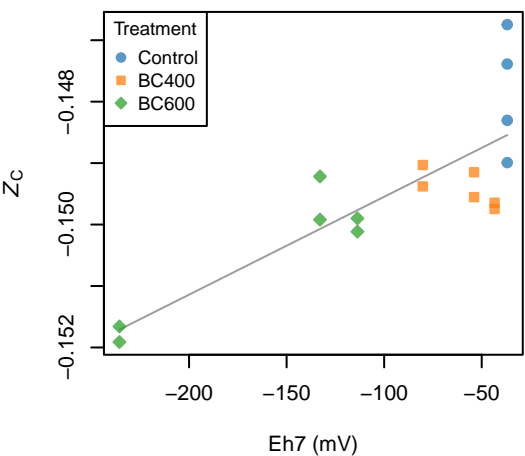

Dabu Town, Hunan Province (MLL+19)

Soil – Bacteria

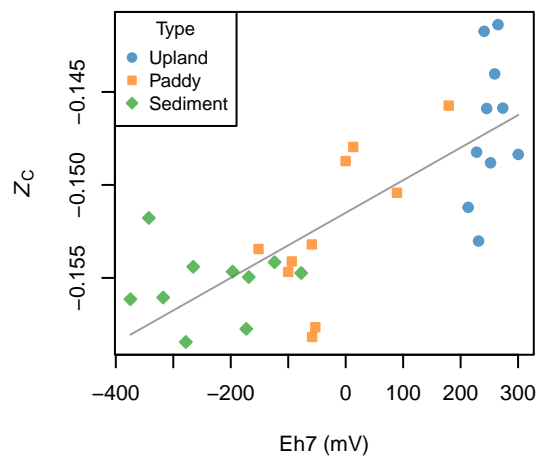

Dabu Town, Hunan Province (MLL+19)

Soil – Archaea

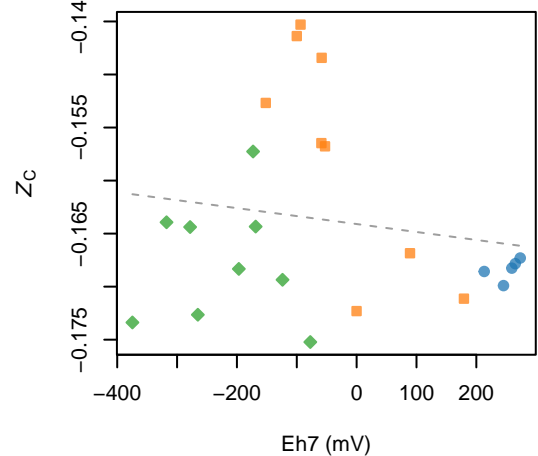

Urban Wetland Soils (BMOB18)

Soil – Bacteria

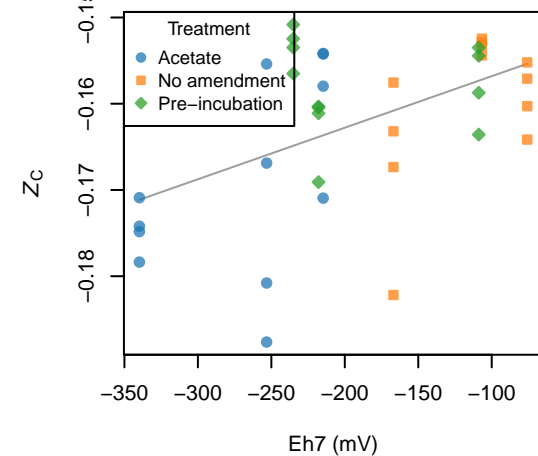

Urban Wetland Soils (BMOB18)

Soil – Archaea

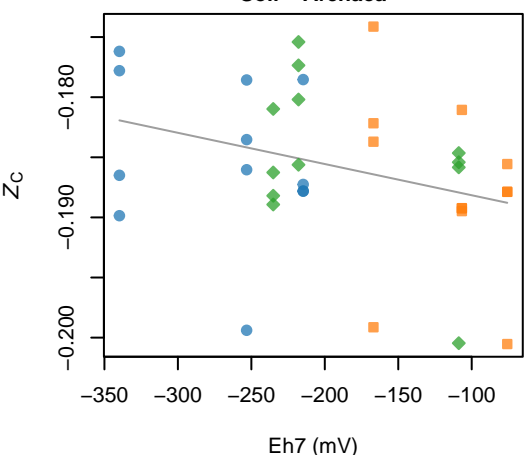

Pentachlorophenol Polluted Soil (ZZZ+18)

Soil – Bacteria

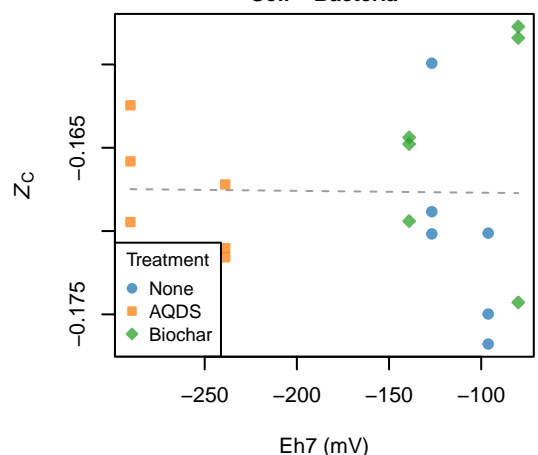

Pentachlorophenol Polluted Soil (ZZZ+18)

Soil – Archaea

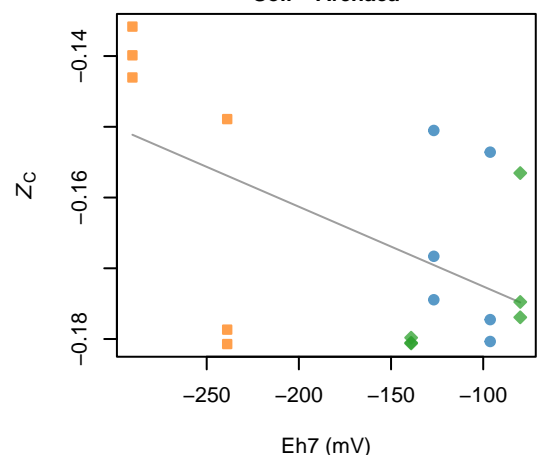

Soil Drainage and Imbibition (PMM+20)

Soil – Bacteria

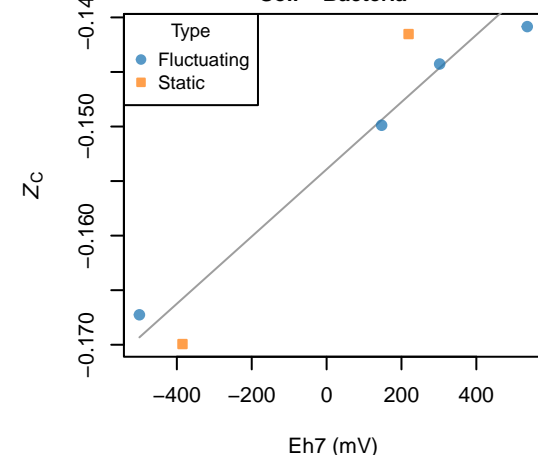

Hydrocarbon Biodegradation (ZHZ+19)

Soil – Bacteria

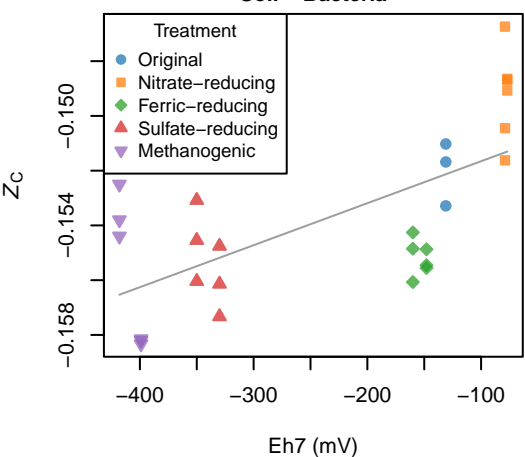

Hydrocarbon Biodegradation (ZHZ+19)

Soil – Archaea

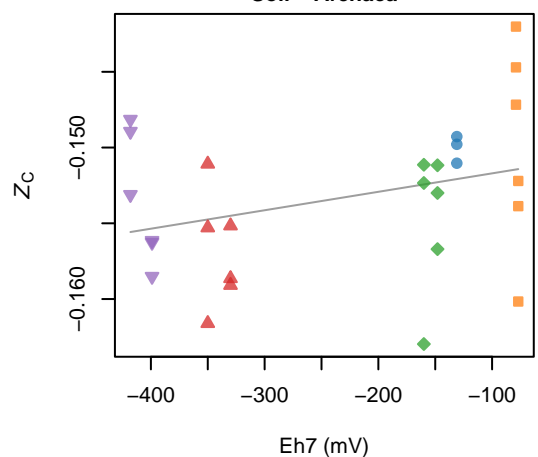

Paddy Soil Water Management (CWC+20)

Soil – Bacteria

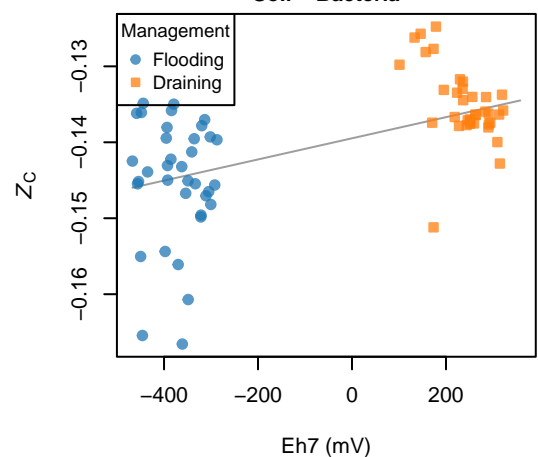

Anaerobic Soil Disinfestation (PSG+20)

Soil – Bacteria

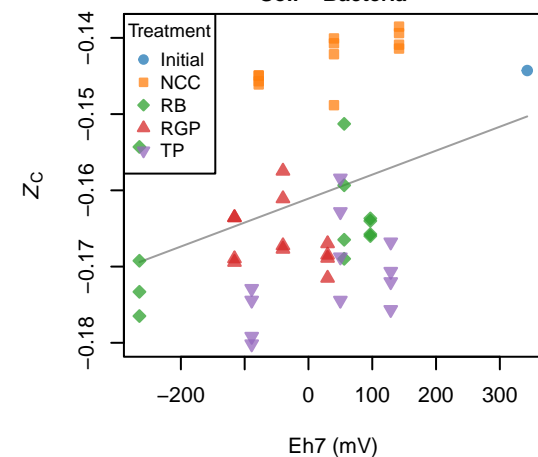

Anaerobic Soil Disinfestation (PSG+20)

Soil - Archaea

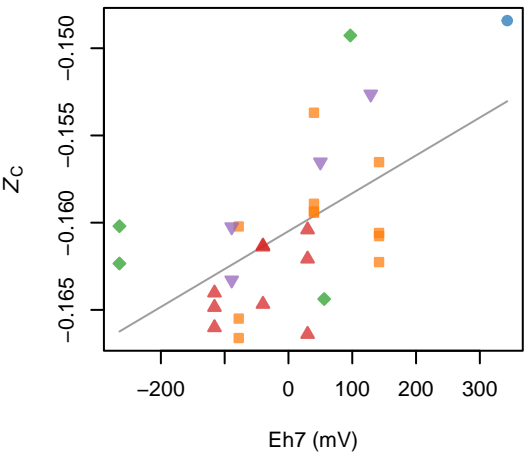

Cd Bioleaching Remediation (XLD+20)

Soil - Bacteria

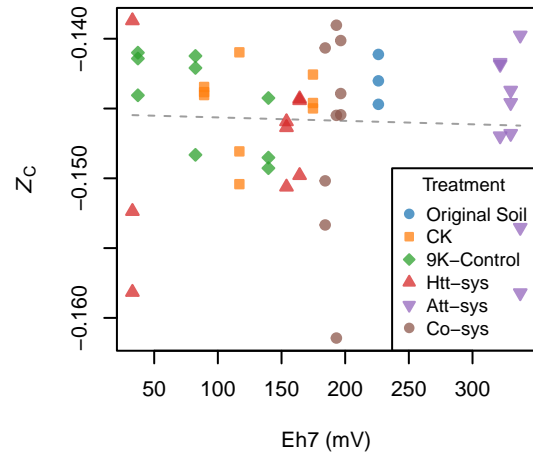

Cd Bioleaching Remediation (XLD+20)

Soil - Archaea

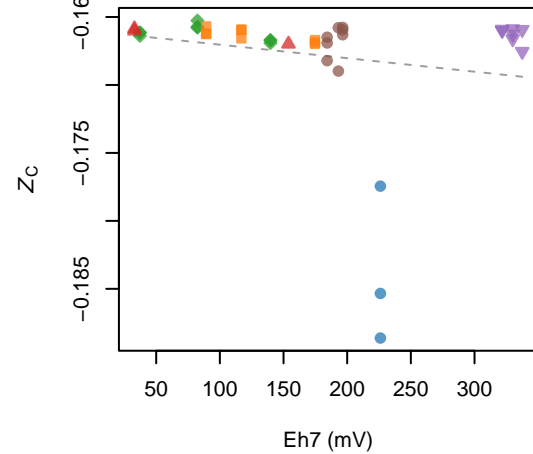

East Asia Paddy Soil (LJC+20)

Soil - Bacteria

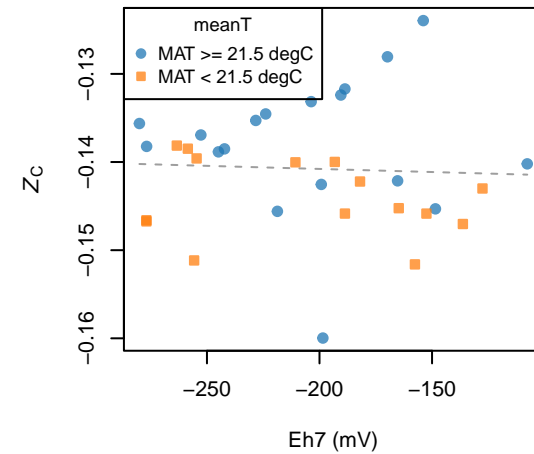

East Asia Paddy Soil (LJC+20)

Soil - Archaea

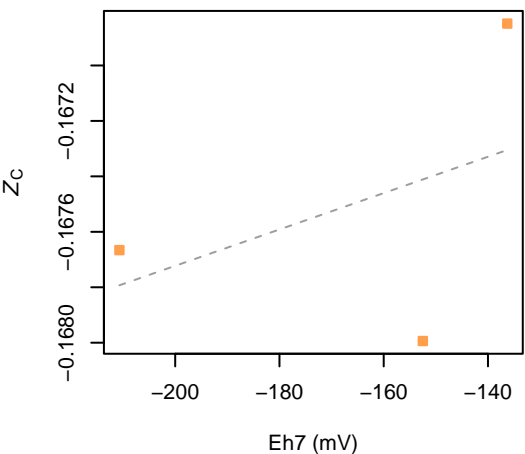

Rice Rhizosphere (DTJ+20)

Soil - Bacteria

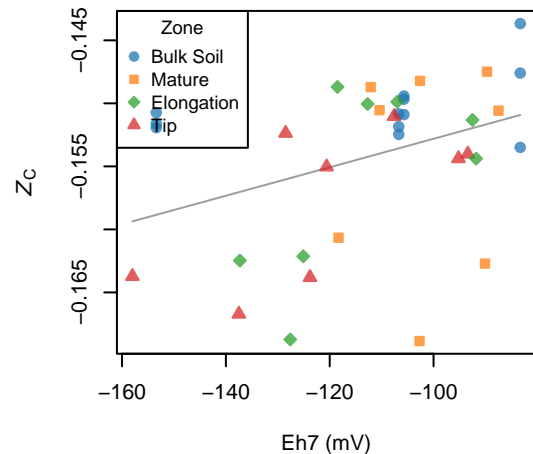

Rice Rhizosphere (DTJ+20)

Soil - Archaea

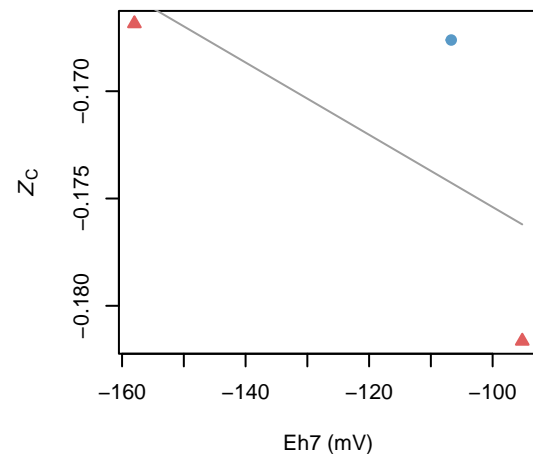

Reductive Soil Disinfestation (LLL+21)

Soil - Bacteria

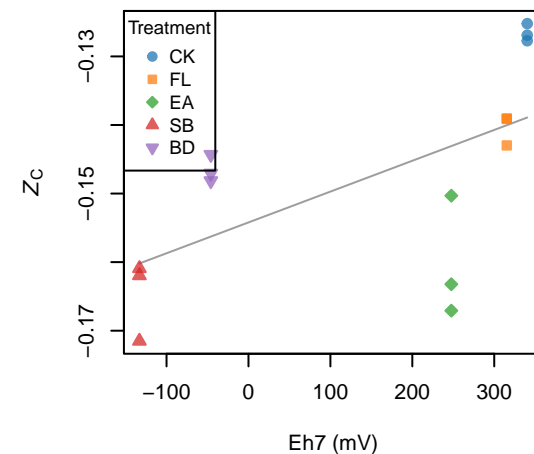

Paddy Soil Amendments (DLS21)

Soil - Bacteria

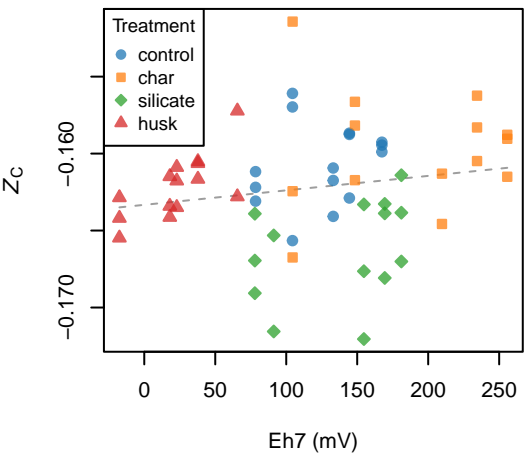

Supplement: Supplementary file [file media-3.pdf]
