# Supplementary material for: Local and global chemical shaping of bacterial communities by redox potential
Source: bioRxiv or medRxiv preprint supplement (doi:10.1101/2021.10.12.464155), 2021-10-13
Supplement: Supplementary file [file media-2.pdf]

Table S2. Sequence processing statistics.

| Study                       | BioProject                                      | Samples | Available reads per sample(a) | Filtered reads per sample(b) | Filtered read length | Sing. %(c) | Chim. %(d) | Reads per sample used for classification | % Classification to genus level | % Mapping to NCBI taxonomy |
|-----------------------------|-------------------------------------------------|---------|-------------------------------|------------------------------|----------------------|------------|------------|------------------------------------------|---------------------------------|----------------------------|
| <b>River &amp; Seawater</b> |                                                 |         |                               |                              |                      |            |            |                                          |                                 |                            |
| MLL+18                      | PRJNA319446 PRJNA357334                         | 47      | 37842                         | 35912                        | 250 (i)              | 19.9       | 0.8        | 9923                                     | 39                              | 96.7                       |
| SVH+19                      | PRJNA423140                                     | 15      | 6631                          | 5604                         | (f)                  | 20.5       | 7.2        | 4132                                     | 17                              | 98.3                       |
| HXZ+20                      | PRJNA503500                                     | 21 (v)  | 92727                         | 75235                        | 440                  | 34.3       | 2.3        | 9773                                     | 44                              | 95.8                       |
| KLY+20                      | PRJNA530625 PRJNA594996                         | 17      | 80103                         | 54187                        | 250 (i)              | 27.3       | 12.8       | 8723                                     | 63                              | 78.2                       |
| WHL+21                      | PRJNA588356                                     | 52      | 79313                         | 57128                        | 400                  | 61.8       | 3.9        | 9555                                     | 62                              | 96.2                       |
| LXH+20                      | PRJNA636956                                     | 17 (n)  | 55689                         | 33760                        | 450 (i)              | 65.3       | 4.7        | 8025                                     | 61                              | 97.5                       |
| JVW+20                      | PRJNA656714                                     | 17      | 189897                        | 29005                        | 250                  | 34.9       | 6.9        | 8948                                     | 38                              | 95.2                       |
| ZZL+21                      | PRJNA681688                                     | 54      | 51033                         | 35179                        | 450                  | 41.7       | 8.5        | 8753                                     | 43                              | 93.3                       |
| GZL21                       | PRJNA733826                                     | 94      | 45674                         | 19625                        | 420                  | 83.0       | 8.7        | 2966                                     | 53                              | 93.7                       |
| <b>Lake &amp; Pond</b>      |                                                 |         |                               |                              |                      |            |            |                                          |                                 |                            |
| SAR+13                      | PRJNA174394                                     | 50 (k)  | 3939                          | 2686                         | (g)                  | (h)        | 5.1        | 2549                                     | 23                              | 87.7                       |
| LZR+17                      | PRJNA255556                                     | 11      | 161057                        | 157861                       | 250 (i)              | 12.4       | 4.5        | 9549                                     | 68                              | 96.4                       |
| ECS+18                      | PRJNA289691                                     | 8       | 95842                         | 60821                        | 400 (i)              | 39.2       | 8.2        | 9180                                     | 32                              | 99.9                       |
|                             |                                                 |         |                               |                              | (t)                  |            |            |                                          |                                 |                            |
| LLC+19                      | PRJNA315049                                     | 36      | 74052                         | 52599                        | 400 (i)              | 19.0       | 7.6        | 9245                                     | 32                              | 94.3                       |
| SCH+16                      | PRJNA321351                                     | 9       | 1029567 (w)                   | 89661                        | 250 (j)              | 17.4       | 9.9        | 9010                                     | 31                              | 91.8                       |
| BCA+21                      | PRJNA395513                                     | 36      | 280205                        | 95996                        | 450                  | 34.9       | 9.9        | 8638                                     | 44                              | 97.9                       |
| HLZ+18                      | PRJNA407260                                     | 27      | 88141                         | 82514                        | 420                  | 32.2       | 5.8        | 9415                                     | 48                              | 95.2                       |
| CNA+20                      | PRJNA473136                                     | 15      | 81278                         | 80204                        | 450                  | 26.6       | 10.0       | 9004                                     | 49                              | 92.1                       |
| BWD+19                      | PRJNA489447                                     | 102 (o) | 76580                         | 63910                        | 400                  | 25.8       | 23.5       | 6900                                     | 43                              | 98.6                       |
| RSJ+21                      | PRJNA516525                                     | 38      | 184093                        | 112153                       | 290                  | 14.5       | 3.7        | 9596                                     | 39                              | 91.3                       |
| BOEM21                      | PRJNA641339                                     | 9       | 41575                         | 35832                        | 400                  | 37.3       | 5.0        | 9504                                     | 55                              | 87.4                       |
| GSY+20                      | PRJEB38636                                      | 19      | 138806                        | 121640                       | 120 (j)              | 1.8        | 0.2        | 9981                                     | 51                              | 93.7                       |
| NLE+21                      | PRJEB39923                                      | 21      | 145541                        | 110098                       | 440                  | 48.9       | 2.5        | 9746                                     | 51                              | 97.3                       |
| FAV+21                      | PRJNA731062                                     | 17      | 245634                        | 74601                        | 400                  | 30.3       | 12.4       | 9412                                     | 44                              | 90.7                       |
| GRG+20                      | mgp83146                                        | 6       | 63388                         | 63388                        | (y)                  | 33.8       | 7.9        | 9211                                     | 43                              | 88.6                       |
| <b>Hot Spring</b>           |                                                 |         |                               |                              |                      |            |            |                                          |                                 |                            |
| SMS+12                      | NA (from authors)                               | 5       | 464                           | 464                          | (u)                  | (u)        | (u)        | 464                                      | 77                              | 75.8                       |
| PCL+18                      | PRJEB24353                                      | 81 (p)  | 43631                         | 24507                        | 250 (q)              | 24.9       | 2.6        | 8863                                     | 62                              | 91.5                       |
| BMJ+19                      | PRJNA541281                                     | 22      | 173978                        | 138702                       | 300                  | 37.0       | 7.0        | 9302                                     | 62                              | 94.3                       |
| LMG+20                      | PRJNA542136                                     | 9       | 188747                        | 109074                       | 280 (j)              | 30.8       | 9.4        | 9057                                     | 73                              | 96.8                       |
| MCC+20                      |                                                 |         |                               |                              |                      |            |            |                                          |                                 |                            |
| GWSS21                      | PRJNA548851                                     | 9       | 36256                         | 29951                        | 300                  | 15.1       | 3.7        | 9627                                     | 79                              | 98.4                       |
| GWS+20                      | PRJNA592622                                     | 16      | 30006                         | 28946                        | 300                  | 17.2       | 5.8        | 9416                                     | 44                              | 98.3                       |
| PBU+20                      | PRJNA623081                                     | 10      | 34728                         | 15016                        | 400                  | 67.7       | 11.6       | 4849                                     | 86                              | 96.8                       |
| MWY+21                      | PRJNA638734                                     | 13      | 58142                         | 53076                        | 250                  | 37.2       | 5.0        | 8996                                     | 39                              | 90.3                       |
| OFY+19                      | NA (OTU Table)                                  | NA      | NA                            | NA                           | NA                   | NA         | NA         | NA                                       | 23                              | 75.9                       |
| <b>Alkaline Spring</b>      |                                                 |         |                               |                              |                      |            |            |                                          |                                 |                            |
| SBP+20                      | PRJNA289273                                     | 24      | 82213                         | 67456                        | 250                  | 8.4        | 14.3       | 8571                                     | 57                              | 95.5                       |
| RMB+17                      | PRJNA352492                                     | 20      | 49966                         | 44726                        | 250                  | 19.2       | 2.4        | 9764                                     | 37                              | 95.0                       |
| CTS+17                      | PRJNA361138                                     | 66      | 82772                         | 71957                        | 400                  | 77.1       | 10.5       | 6331                                     | 35                              | 98.8                       |
| KSR+21                      | PRJNA685937                                     | 8       | 73796                         | 60037                        | 440                  | 35.5       | 11.6       | 8844                                     | 25                              | 92.3                       |
| NTB+21                      | PRJNA743134                                     | 37      | 23417                         | 19081                        | 150(j)               | 12.1       | 8.2        | 5041                                     | 32                              | 99.8                       |
| <b>Groundwater</b>          |                                                 |         |                               |                              |                      |            |            |                                          |                                 |                            |
| KLM+16                      | PRJNA308958                                     | 30      | 9917                          | 6076                         | (f)                  | 58.4       | 3.0        | 2455                                     | 43                              | 91.5                       |
| YHK+19                      | PRJDB5959                                       | 13      | 91096                         | 25089                        | 250 (i)              | 37.6       | 1.1        | 9801                                     | 37                              | 97.2                       |
|                             |                                                 |         |                               |                              | (x)                  |            |            |                                          |                                 |                            |
| SDH+19                      | PRJNA408058                                     | 6       | 37333                         | 36503                        | 300                  | 53.8       | 11.6       | 8839                                     | 65                              | 99.3                       |
| SRM+19                      | PRJNA434769                                     | 19      | 154589                        | 30740                        | 250                  | 31.2       | 11.7       | 8426                                     | 47                              | 93.5                       |
| APV+20                      | PRJNA488796                                     | 24      | 86279                         | 69012                        | 250                  | 25.3       | 7.2        | 9094                                     | 55                              | 90.7                       |
| SKP+21                      | PRJNA528471                                     | 12      | 98161                         | 11218                        | 200                  | 38.1       | 5.5        | 5910                                     | 19                              | 96.5                       |
| YHK+20                      | PRJEB33032                                      | 33 (l)  | 99926                         | 48564                        | 400                  | 39.6       | 6.8        | 7412                                     | 33                              | 55.2                       |
| JDP+20                      | PRJNA553521                                     | 8       | 188240                        | 135572                       | 275 (i)              | 19.6       | 14.8       | 8524                                     | 65                              | 99.9                       |
| GWS+19                      | PRJNA623081                                     | 11      | 31412                         | 33576                        | 300                  | 13.7       | 5.4        | 9464                                     | 35                              | 99.1                       |
| SRM+21                      | PRJNA630252                                     | 13      | 87292                         | 36180                        | 250                  | 37.6       | 12.8       | 8718                                     | 34                              | 94.2                       |
| ZCZ+21                      | PRJNA667833                                     | 18      | 22010                         | 19704                        | 450                  | (m)        | 49.9       | 4721                                     | 54                              | 95.0                       |
| <b>Sediment</b>             |                                                 |         |                               |                              |                      |            |            |                                          |                                 |                            |
| JHL+12                      | SRP009131                                       | 15      | 5639                          | 3566                         | (f)                  | 35.6       | 5.0        | 2183                                     | 54                              | 99.2                       |
| GFE+16                      | PRJNA262691                                     | 16      | 25170                         | 21905                        | (s)                  | 65.8       | 33.7       | 4557                                     | 16                              | 89.8                       |
| ZML+17                      | PRJEB12432 PRJEB12429                           | 66      | 25188                         | 19726                        | 400 (i)              | 77.6       | 8.9        | 3945                                     | 38                              | 97.8                       |
| BYB+17                      | PRJNA319444                                     | 16      | 13652                         | 7189                         | (f)                  | (h)        | 22.4       | 5577                                     | 38                              | 93.1                       |
| BSPD17                      | PRJNA322450                                     | 32      | 97803                         | 49495                        | 400                  | 78.7       | 6.7        | 5386                                     | 75                              | 86.1                       |
| HDZ+19                      | PRJNA352457                                     | 28      | 158622                        | 97143                        | 420                  | 52.2       | 6.2        | 9380                                     | 55                              | 92.2                       |
| WHLH21                      | PRJNA400089                                     | 20      | 60168                         | 16758                        | 400 (i)              | 38.9       | 0.8        | 7927                                     | 47                              | 95.6                       |
| SCM+18                      | PRJNA429278                                     | 11      | 144324                        | 52805                        | 250 (j)              | 47.8       | 10.4       | 8962                                     | 22                              | 97.2                       |
| CLS+19                      | PRJNA437688 PRJNA437695 PRJNA437692 PRJNA437697 | 45      | 145210                        | 138438                       | 150 (i)              | 69.4       | 0.1        | 8812                                     | 33                              | 94.5                       |
| ZDA+20                      | PRJEB28365                                      | 16      | 69934                         | 51796                        | 450 (i)              | 62.0       | 10.5       | 8798                                     | 58                              | 89.0                       |
| VMB+19                      | PRJNA453733                                     | 6       | 106023                        | 68644                        | 380 (i)              | 47.8       | 3.1        | 9687                                     | 54                              | 92.2                       |
| WHC+19                      | PRJNA488529                                     | 12      | 122751                        | 101233                       | 420                  | 54.9       | 8.6        | 9236                                     | 80                              | 91.2                       |
| HSF+19                      | PRJNA507590                                     | 63      | 47969                         | 31059                        | 440                  | 35.2       | 4.3        | 8370                                     | 30                              | 84.3                       |
| MCS+21                      | PRJEB31703                                      | 14      | 101917                        | 75549                        | 400                  | 61.7       | 2.6        | 7893                                     | 35                              | 95.1                       |
| LMBA21                      | PRJEB35647                                      | 256     | 63613                         | 43031                        | 280 (j)              | 52.3       | 8.4        | 8149                                     | 36                              | 93.6                       |
| ZZLL21                      | PRJNA616197                                     | 71      | 58505                         | 38640                        | 450                  | 60.3       | 10.4       | 7303                                     | 53                              | 88.3                       |
| WFB+21                      | PRJNA639965                                     | 83      | 115656                        | 87532                        | 440                  | 32.9       | 4.7        | 8936                                     | 35                              | 88.6                       |
| <b>Soil</b>                 |                                                 |         |                               |                              |                      |            |            |                                          |                                 |                            |
| SBW+17                      | PRJNA341915                                     | 16      | 52013                         | 36856                        | 280 (j)              | 52.4       | 15.7       | 8428                                     | 34                              | 70.3                       |
| MLL+19                      | PRJNA361046                                     | 30      | 43372                         | 36941                        | 250 (i)              | 46.1       | 1.7        | 9509                                     | 32                              | 83.8                       |
| BMOB18                      | PRJNA415514                                     | 48      | 13229                         | 11791                        | 300 (i)              | 41.0       | 9.7        | 5937                                     | 23                              | 89.1                       |
| ZZZ+18                      | PRJNA427749 PRJNA427853                         | 36      | 43487                         | 38493                        | 240 (j)              | 16.3       | 4.6        | 9430                                     | 67                              | 95.7                       |
| PMM+20                      | PRJEB28313                                      | 6       | 53965                         | 34921                        | 400                  | 80.5       | 29.0       | 4825                                     | 48                              | 80.2                       |
| ZHZ+19                      | PRJNA523725                                     | 31      | 132508                        | 126589                       | 300                  | 77.9       | 7.7        | 9230                                     | 23                              | 87.7                       |
| CWC+20                      | PRJNA564714                                     | 84      | 83475                         | 68477                        | 440                  | 52.2       | 8.2        | 9183                                     | 62                              | 72.8                       |
| PSG+20                      | PRJNA575041                                     | 49      | 77866                         | 21021                        | 250                  | 29.7       | 2.9        | 9435                                     | 55                              | 57.6                       |
| XLD+20                      | PRJNA576993                                     | 48      | 27908                         | 24913                        | 250 (i)              | 38.2       | 4.5        | 8351                                     | 71                              | 87.6                       |
| LJC+20                      | PRJNA607877                                     | 45      | 57625                         | 53602                        | 420                  | 79.0       | 3.9        | 8542                                     | 50                              | 91.8                       |
| DTJ+20                      | PRJNA611687                                     | 36      | 51462                         | 34005                        | 420                  | 79.8       | 7.3        | 6392                                     | 41                              | 80.0                       |
| LLL+21                      | PRJNA665924                                     | 15      | 56756                         | 36987                        | 450                  | 70.4       | 9.5        | 7134                                     | 51                              | 79.4                       |
| DLS21                       | PRJNA690162                                     | 143     | 131364                        | 79634                        | 300 (j)              | 97.5       | 2.0        | 1909                                     | 35                              | 74.4                       |
| <b>Winogradsky Columns</b>  |                                                 |         |                               |                              |                      |            |            |                                          |                                 |                            |
| RBW+14                      | PRJNA234104                                     | 53 (r)  | 12933                         | 7507                         | 250                  | 44.9       | 2.6        | 4032                                     | 47                              | 84.4                       |

- a. Paired forward and reverse reads are counted as one. Paired-end reads were merged with “vsearch -fastq\_mergepairs” with default options; reads that failed merging were excluded from the subsequent analysis. All “reads per sample” columns are averages of all samples.
- b. Quality filtering was done with “vsearch -fastq\_filter” with the options “-fastq\_truncclen *length* -fastq-qmax 41 -fastq\_maxee\_rate 0.005” with length value given in next column.
- c. Reads in all samples (runs) were pooled and singletons (sequences appearing exactly once) were identified with “vsearch -derep\_fulllength” with the option “-maxuniquesize 1”. The singletons were removed from the pooled file using “seqtk subseq”; the remaining sequences for each run were extracted from the pooled file using an awk command. After removing the singletons, for runs with more than 10000 reads, 10000 reads were subsampled using “vsearch -fastx\_subsample” with the options “-sample\_size 10000” and “-randseed 1234”.
- d. After subsampling, runs were pooled again and chimeras were removed using “vsearch -uchime\_ref” with the option “-nonchimeras” to output non-chimeric sequences (i.e. those not classified as either chimeras or borderline chimeras). The remaining sequences for each run were extracted from the output and used for taxonomic classification.
- f. For these 454 sequencing experiments, filtering was done with “vsearch -fastq\_filter” with options “-fastq\_minlen 200 -fastq\_maxlen 600 -fastq\_truncqual 15” for read length and quality filtering.
  - g. As above, but with -fastq\_truncqual 11.
  - h. Because of the high number of singletons and low sequence count, singletons were not removed.
  - i. Only forward reads available.
  - j. Only forward reads used.
  - k. This is number of runs (there are multiple runs for most samples).
  - l. Excludes 5 samples with failed merging.
  - m. A large majority of sequences were identified as singletons, so they were not removed prior to subsampling.
  - n. Only the first available replicate for each sample was used.
  - o. Only one replicate with the most runs for each sample was used.
  - p. Randomly selected 100 SRA runs, kept samples with available ORP values on the 1000Springs website, and filtered remaining samples into acidic (42 with pH < 3) and neutral-alkaline (39 with pH > 6) groups.
    - q. Only forward reads available; for these Ion Torrent PGM sequences, the option -fastq-qmax 45 was added.
    - r. Only includes runs listed in SI Table of paper and excludes one run (SRR1140937) with low number of spots (1).
    - s. As in (f), but with -fastq\_truncqual 11 and -fastq\_minlen 100.
    - t. Used -fastq-qmax 93.
    - u. Because only FASTA files are available, no quality filtering was done; also, because of the very low numbers of reads, no singleton or chimera removal was done.
    - v. Sequences from Station C4 were used for samples outside the Blue Hole.
    - w. Because of the large number of available reads, only the first 100000 from each run were processed.
    - x. Use -fastq\_maxee\_rate 0.05 (not the 0.005 used for other datasets).
    - y. Because only FASTA files are available, no quality filtering was done.
